# Supplementary material
Source: PubMed Central journal article supplement (PMC7371497)
Supplement: NIHMS1569241-supplement-2.pdf [file NIHMS1569241-supplement-2.pdf]

# The phosphatase regulator NIPP1 restrains chemokine-driven skin inflammation

Iris Verbinnen<sup>1</sup>, Marloes Jonkhout<sup>1</sup>, Kifayathullah Liakath-Ali<sup>2</sup>, Kathelijne Széker<sup>1</sup>, Mónica Ferreira<sup>1</sup>, Shannah Boens<sup>1</sup>, Raphael Rouget<sup>1</sup>, Margareta Nikolic<sup>1</sup>, Susan Schlenner<sup>3</sup>, Aleyde Van Eynde<sup>1</sup>, and Mathieu Bollen<sup>1</sup>

## SUPPLEMENTARY INFORMATION

- Supplementary figures S1-S6 and supplementary legends to the figures and Movie S1.
- Supplementary Materials and Methods.
- Supplementary references.
- Supplementary table S1: primers for genotyping.
- Supplementary table S2: antibodies.
- Supplementary table S3: RT-qPCR primers.
- Supplementary table S4: Differentially expressed genes (DEGs) SKOvsCTR (FDR<0.01, two-fold cut-off).
- Supplementary table S5: Downregulated DEGs (SKOvsCTR) are enriched for *Krt* and *Krtap* genes.
- Supplementary table S6: Overlap of upregulated DEGs (SKOvsCTR) and the GO\_Immune\_System\_Process gene set.
- Supplementary Movie S1

## Figure S1

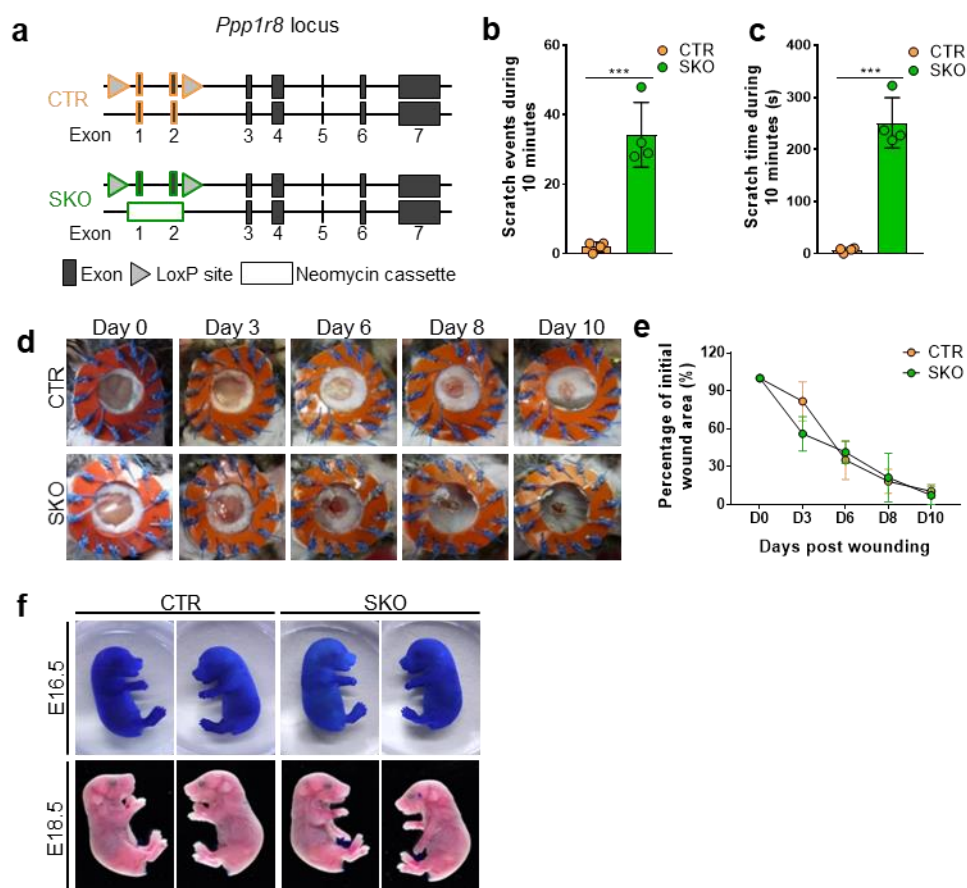

### Supplementary Figure 1. Generation and phenotype of skin-specific *Ppp1r8* knockout mice.

(a) Schematic representation of the genotype of keratinocytes of CTR and SKO mice. CTR,  $Tg(Krt14-Cre)/Ppp1r8^{fl/+}$ ; SKO,  $Tg(Krt14-Cre)/Ppp1r8^{fl/-}$ . (b) Quantification of scratch events during 10 minutes by CTR and SKO mice of 6-7 months ( $n=4$ ). (c) Quantification of scratch time during 10 minutes by CTR and SKO mice of 6-7 months ( $n=4$ ). (d) Representative pictures of healing of 5-mm punch wounds in CTR and SKO back skin. (e) Quantification of wound healing as shown in panel d (5 CTR and 3 SKO). (f) Representative images of toluidine blue stainings of CTR and SKO embryos at E16.5 and E18.5.

Bar data are represented as means  $\pm$  SD. \*\*\*,  $p < 0.001$  (unpaired student's t-test).

## Figure S2

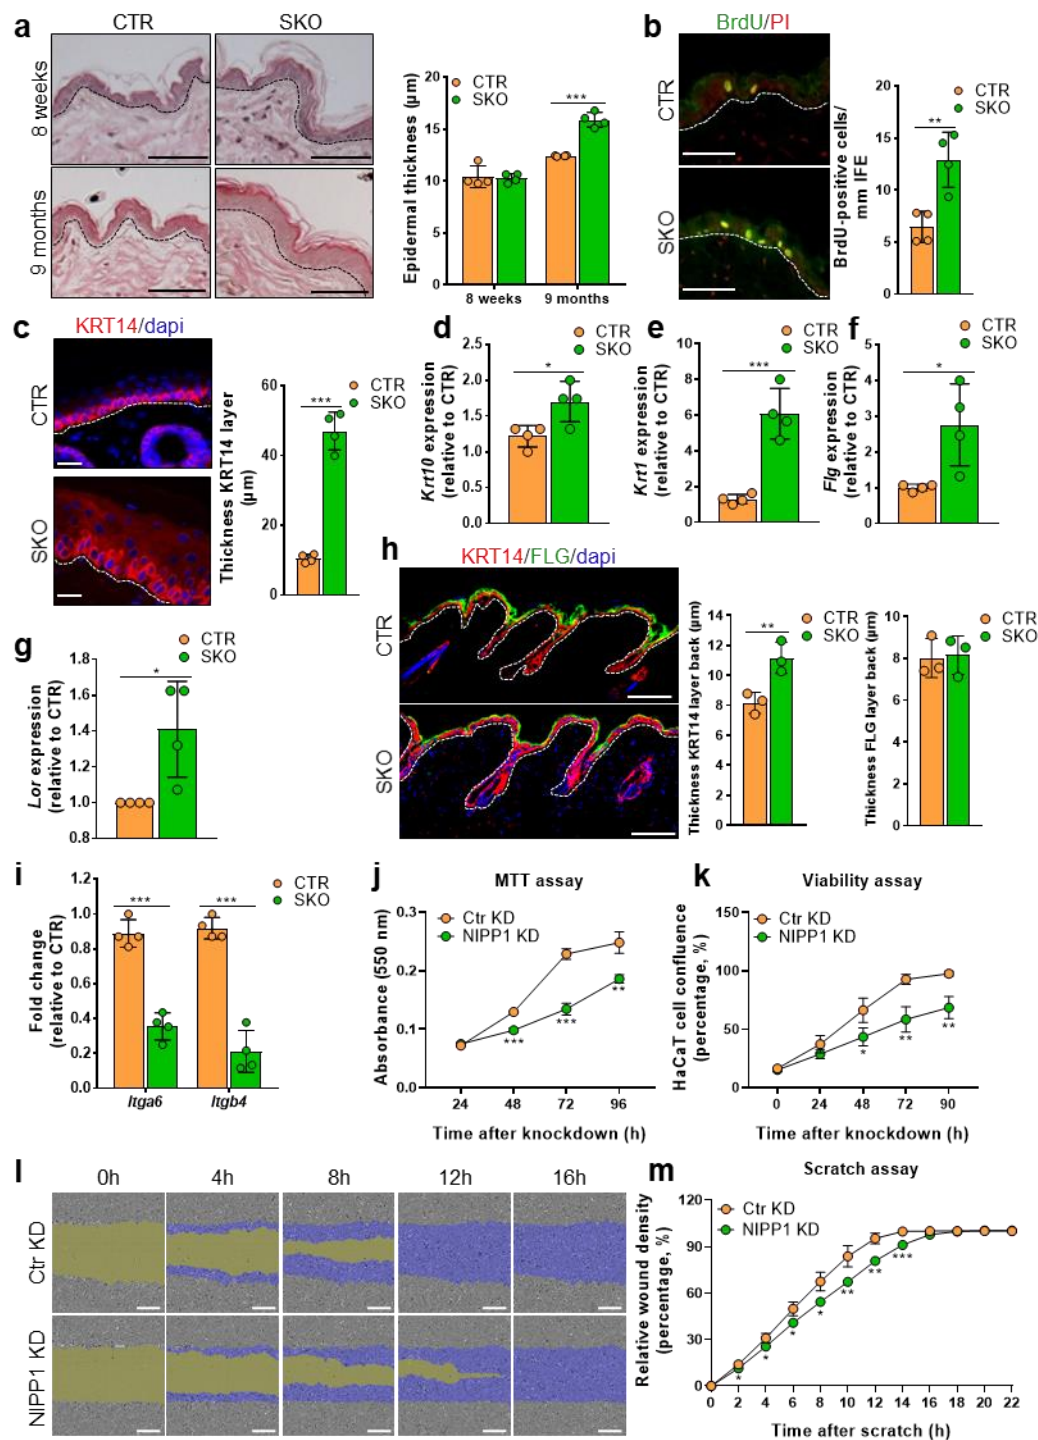

## Supplementary Figure 2. Hyperproliferation phenotype in SKOs.

(a) H&E stainings of back skin sections of CTR and SKO mice at the age of 8 weeks and 9 months. Hematoxylin was used as a nuclear counterstain. Scale bars, 50  $\mu\text{m}$ . The bar diagrams

show the quantification of epidermal thickness (n=4). **(b)** Back skin sections from CTRs and SKOs of 8 weeks were immunostained for incorporated BrdU after a 4h pulse labeling. Propidium iodide (PI) was used as a nuclear counterstain. The bar diagrams show the quantification (n=4). **(c)** Tail skin sections from CTRs and SKOs of 8 weeks were immunostained for Keratin-14 (KRT14). Control stainings (i.e. no primary antibody, only secondary antibody) were negative. Dapi was used as a nuclear counterstain. The bar diagram shows the quantification of layer thickness based on the KRT14 immunostainings (n=4). Scale bars, 25  $\mu$ m. **(d-g)** qRT-PCR analysis of the indicated differentiation markers in tail epidermis from 8-week-old CTR and SKO mice. *Hprt* was used as housekeeping gene for normalization (n=4). **(h)** Back skin sections from CTR and SKO mice of 8 weeks were immunostained for KRT14 and Filaggrin (FLG). Dapi was used as a nuclear counterstain. The bar diagrams show the quantification of layer thickness based on the KRT14- and FLG-immunostainings (indicated in the y-axis) (n=3). Scale bars, 100  $\mu$ m. **(i)** qRT-PCR of integrins *Itga6* and *Itgb4* in tail epidermis from 8-week-old CTR and SKO mice. *Hprt* was used as housekeeping gene for normalization (n=4). **(j, k)** The growth rate of HaCaT cells after control (Ctr) or NIPP1 knockdown (KD) was determined by MTT assays **(j)** and viability assays (IncuCyte) **(k)** at the indicated time points. Values (points) are represented as means  $\pm$  SD (n=3). **(l)** The effect of NIPP1 on cell migration was measured by the IncuCyte scratch wound assay. Representative pictures show the initial scratch wound mask (purple) that gets infiltrated by migrated HaCaT cells (yellow scratch wound mask) at the indicated time points after scratching in control and NIPP1-depleted HaCaT cells. **(m)** Wound closure during the IncuCyte scratch wound assay is shown as the relative wound density in percentage at the indicated time points. Each point is the mean of three independent experiments  $\pm$  SD (n=3).

All bar data are represented as means  $\pm$  SD. \*,  $p < 0.05$ ; \*\*,  $p < 0.01$ ; \*\*\*,  $p < 0.001$  (unpaired student's t-test).

## Figure S3

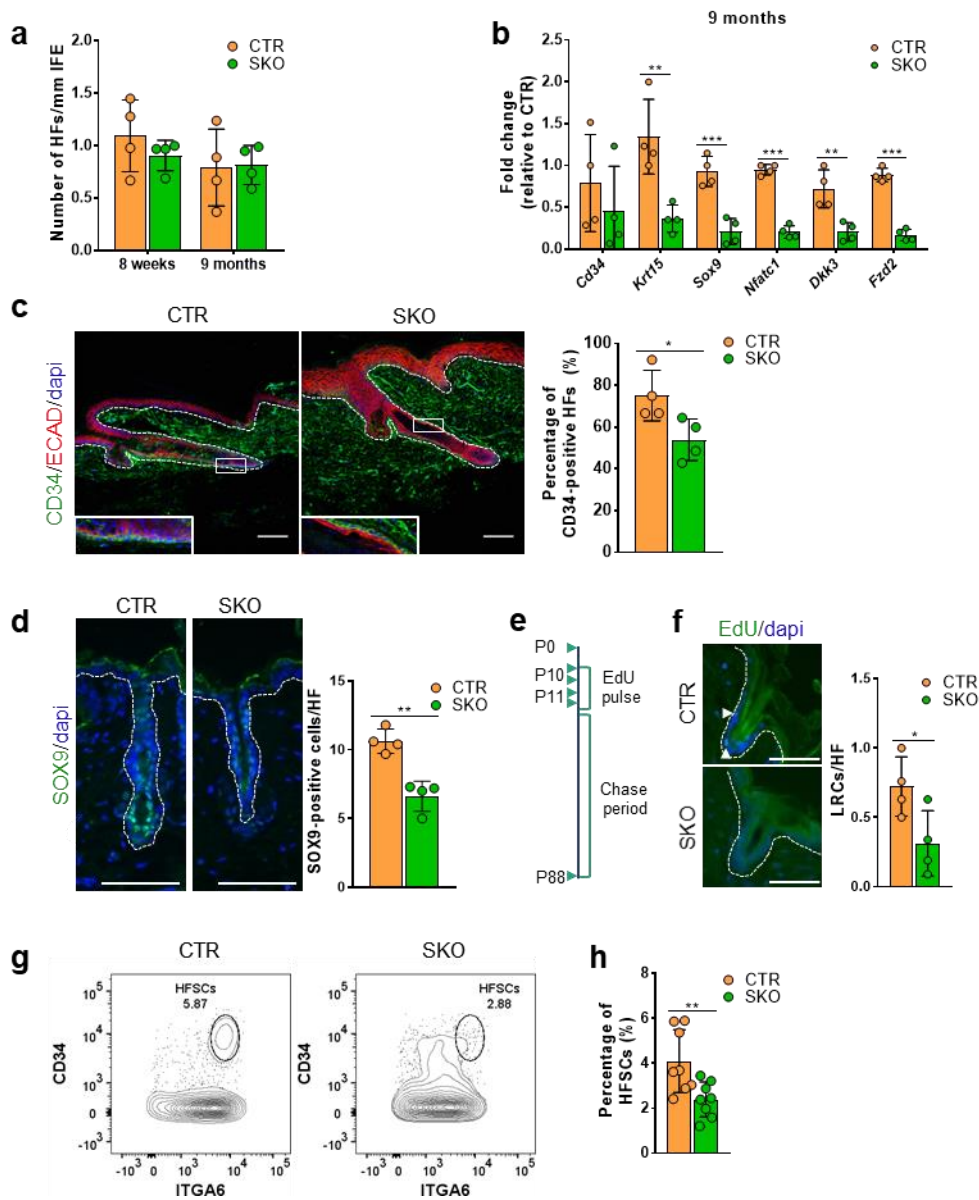

## Supplementary Figure 3. The fate of HFSCs in SKOs.

(a) Quantification of the number of hair follicles (HF) in tail skin from CTR and SKO at 8 weeks and 9 months (n=4). (b) qRT-PCR analysis of the indicated HFSC markers in tail epidermis from CTR and SKO mice of 9 months (n=4). *Hprt* was used as housekeeping gene for normalization. (c) Tail skin sections from CTR and SKO mice of 10 weeks were immunostained for the HFSC marker CD34 and the adherens junction component E-Cadherin (ECAD). The number of positive cells per HF was quantified (bar diagrams, n=4). Dapi was used for nuclear staining. Scale bars, 200  $\mu$ m. (d) Back skin sections from CTR and SKO mice of 8 weeks were immunostained for the HFSC marker SOX9 and quantified (bar diagrams,

n=4). Dapi was used for nuclear staining. Scale bars, 75  $\mu\text{m}$ . **(e)** Procedure of EdU pulse-chase experiment. 10-days-old-pups were injected intraperitoneally with 5-ethynyl-2'-deoxyuridine (EdU) every 12 hours for a total of 4 injections. Skin samples were collected 77 days after the last injection. **(f)** Back skin sections from EdU-injected CTR and SKO mice were stained for EdU. The bar diagrams show the quantification of the number of EdU-label retaining cells (LRCs) cells per hair follicle (HF). LRCs are indicated by white arrowheads. Dapi was used for nuclear staining. Scale bars, 50  $\mu\text{m}$ . **(g)** Representative flow cytometry profiles of epidermal cells that were isolated from tail skin of 8-week-old CTR and SKO mice and gated for CD34 and ITGA6. **(h)** Quantification (n=8) of the frequency of HFSCs (CD34<sup>high</sup> ITGA6<sup>high</sup>) by FACS sorting analysis.

Data are represented as means  $\pm$  SD. \*,  $p < 0.05$ ; \*\*,  $p < 0.01$ ; \*\*\*,  $p < 0.001$  (unpaired student's t-test).

## Figure S4

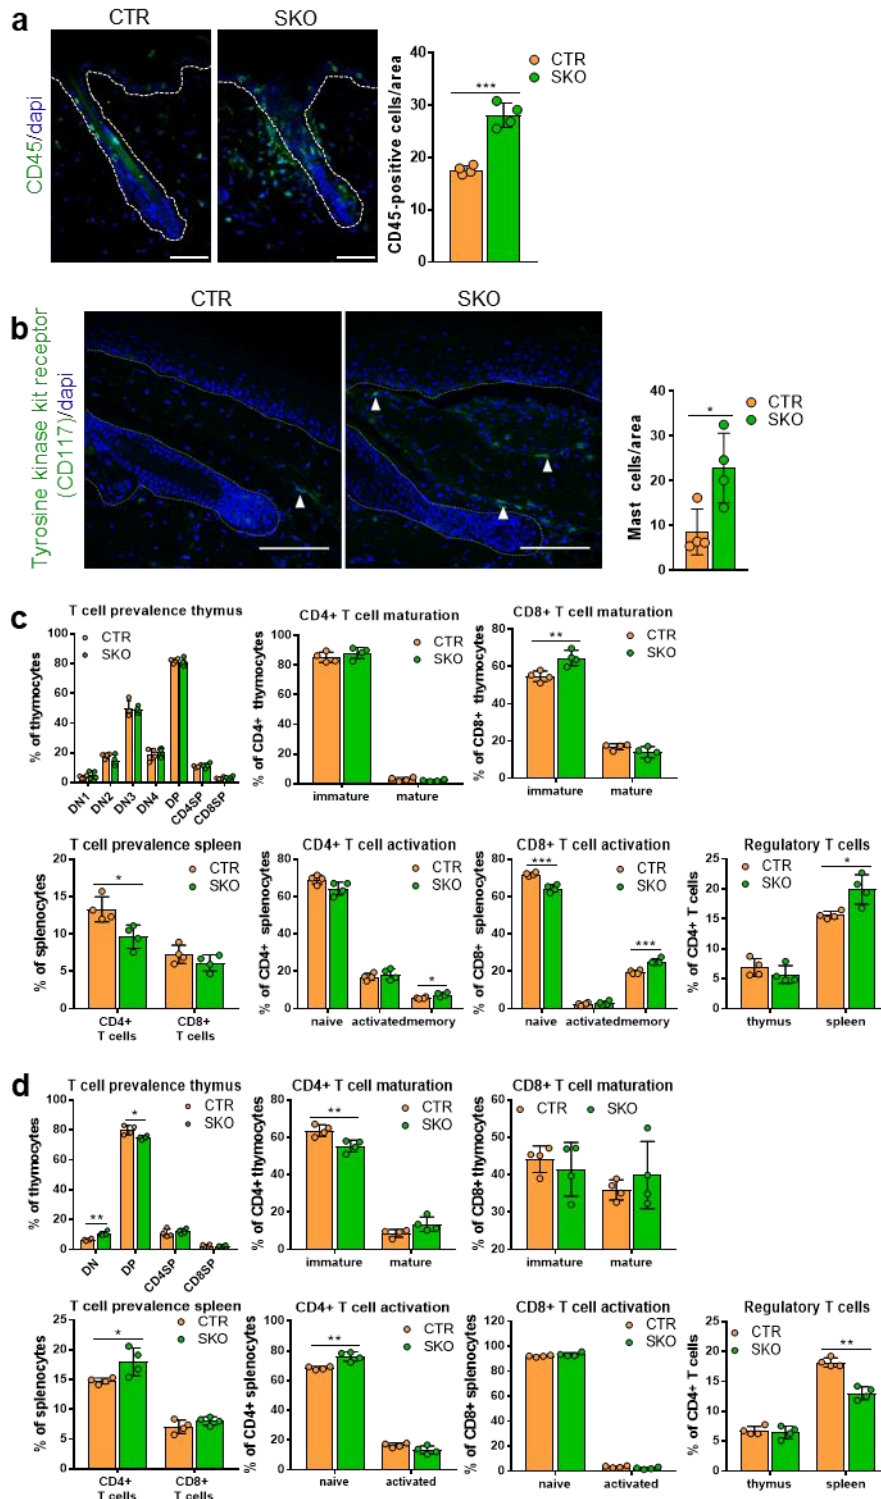

**Supplementary Figure 4. Immune response in SKOs.**

(a) Back-skin sections from CTRs and SKOs of 8 weeks were immunostained for the pan-immune cell marker CD45. Dapi was used as a nuclear counterstain. The bar diagrams show quantifications (n=4). Scale bars, 50  $\mu\text{m}$ . (b) Tail-skin sections from CTRs and SKOs of 10 weeks were stained for the mast-cell marker tyrosine kinase kit receptor (CD117) (left panel). Dapi was used as nuclear counterstaining. Area = 100.000  $\mu\text{m}^2$ . For each mouse, 15 pictures were analyzed and the area was extrapolated to 100.000  $\mu\text{m}^2$ . The bar diagrams show the quantification (n=4). Scale bars, 100  $\mu\text{m}$ . (c) FACS analysis of T-cell prevalence in the thymus, CD4+ and CD8+ T-cell maturation, T-cell prevalence in the spleen, CD4+ and CD8+ T-cell activation and Regulatory T-cells from CTR and SKO mice of 4 weeks (n=4). (d) Idem as in panel (c) but for mice of 8-12 weeks (n=4).

Data are represented as means  $\pm$  SD. \*,  $p < 0.05$ ; \*\*,  $p < 0.01$ ; \*\*\*,  $p < 0.001$  (unpaired student's t-test).



## Figure S5

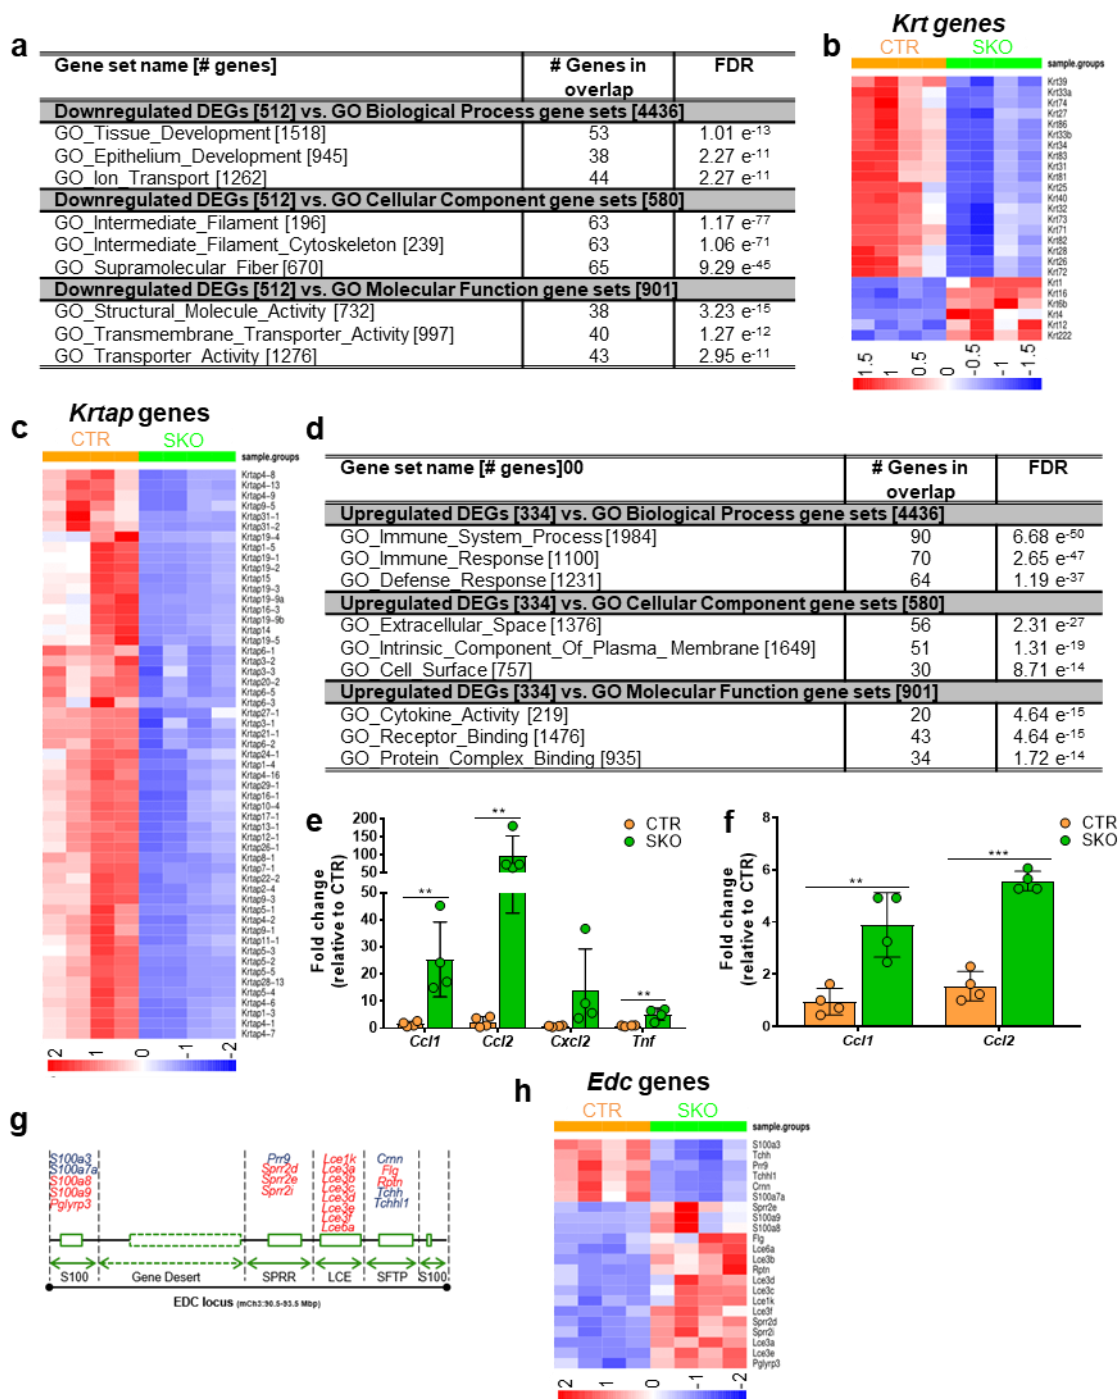

## Supplementary Figure 5. Differentially expressed genes in the SKOs.

(a) Gene set enrichment analyses (GSEA) for biological, cellular and molecular function of all downregulated genes (FDR < 0.01, two-fold cut-off) in tail epidermis from CTR and SKO mice of 8 weeks. (b-c) Heat map of the significantly (FDR < 0.01, cut-off > 2-fold change) altered *Krt* (b) and *Krtap* (c) genes (n=4). (d) Gene set enrichment analyses (GSEA) for biological, cellular and molecular function of all upregulated genes (FDR < 0.01, two-fold cut-off) in tail epidermis from CTR and SKO mice of 8 weeks. (e, f) qRT-PCR analysis of the indicated

cytokines in tail (**e**) and back (**f**) epidermis from CTRs and SKOs of 8 weeks. *Hprt* was used as housekeeping gene for normalization. Data are represented as means  $\pm$  SD (n=4). \*\*, p<0.01; \*\*\*, p<0.001 (unpaired student's t-test). (**g**) Schematic representation of the epidermal-differentiation-complex (EDC) locus in a ~3.1 Mb region of mouse chromosome 3. This locus comprises four tandemly arrayed gene families, i.e. the calcium-binding S100 proteins, the small-proline-rich-proteins (SPRR), the late-cornified-envelope-proteins (LCE) and the S100-fused-type-proteins (SFTP). (**h**) Heat map of the significantly (FDR < 0.01, cut-off > 2-fold change) altered genes in the EDC locus (n=4).

## Figure S6

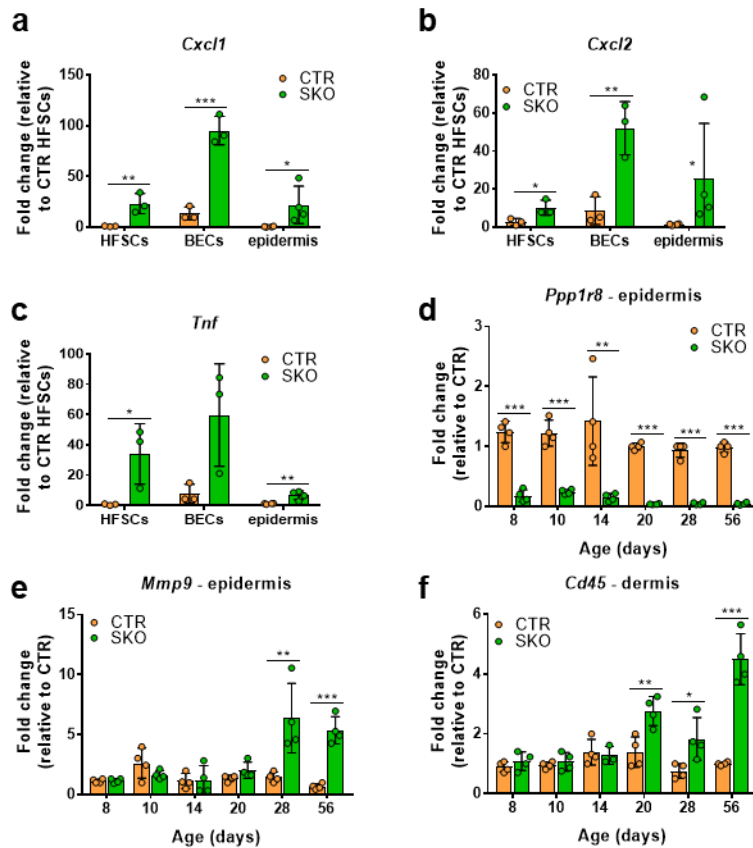

### Supplementary Figure 6. Chemokine secretion in the skin of SKOs.

(a-c) qRT-PCR analysis of the indicated cytokines in FACS-purified HFSCs and BECs (n=3) and in total tail epidermis (n=4). *Hprt* was used as a housekeeping gene for normalization. (d) qRT-PCR analysis of *Ppp1r8* expression in tail epidermis from CTRs and SKOs of the indicated ages (n=4). *Hprt* was used as a housekeeping gene for normalization. (e) qRT-PCR analysis of *Mmp9* expression in tail epidermis of CTR and SKOs of the indicated ages (n=4). *Hprt* was used as a housekeeping gene for normalization. (f) qRT-PCR analysis of *CD45* expression in tail dermis of CTR and SKOs of the indicated ages (n=4). *Hprt* was used as a housekeeping gene for normalization.

All bar data are represented as means  $\pm$  SD. \*,  $p < 0.05$ ; \*\*,  $p < 0.01$ ; \*\*\*,  $p < 0.001$  (unpaired student's t-test).

### Supplementary Movie 1. Scratching behaviour of SKO mice.

Mice were monitored for 10 minutes with a camera and afterwards their scratching behaviour was analyzed. Movie S1 shows 20 seconds of the monitoring of two CTR (orange labels) and two SKO (green labels) mice.

## SUPPLEMENTARY MATERIALS AND METHODS

### Mouse treatment and experimental design

Mice were housed in a pathogen-free animal facility under standard 12h-light/dark cycles with water and chow *ad libitum*. We used CRE recombinase (CRE) under control of the *Keratin-14* (*Krt14*) promoter to disrupt *Ppp1r8* in keratinocytes from embryonic day (E) 14.5 (Vasioukhin et al. 1999). First, transgenic (Tg) *Krt14-Cre* mice (gift from Walter Birchmeier, Max-Delbrueck-Center for Molecular Medicine, Berlin, Germany) were mated with animals carrying one *Ppp1r8* null allele (*Ppp1r8*<sup>+/-</sup>). Next, Tg(*Krt14-Cre*)/*Ppp1r8*<sup>+/-</sup> offspring was crossed with mice engineered to have LoxP sites in the promoter region and intron 2 of both *Ppp1r8* alleles (*Ppp1r8*<sup>fl/fl</sup>) and described in (9). Tg(*Krt14-Cre*)/*Ppp1r8*<sup>fl/+</sup> and Tg(*Krt14-Cre*)/*Ppp1r8*<sup>fl/-</sup> were used as controls (CTR) and skin-specific NIPPI1 knockout (SKO) mice, respectively (The generation of *Ppp1r8*<sup>fl/fl</sup> mice is described in (Boens et al. 2016). DNA used for genotyping was extracted from ear biopsies. PCR primers are described in **Table S1** and the PCR conditions are available on request. Mice were injected with 5'-bromo 2'-deoxyuridine (BrdU) (Sigma-Aldrich) 4h before they were sacrificed. Skin sections were either directly frozen in liquid nitrogen or fixed in PBS containing 4% formaldehyde, or else incubated overnight at 4°C with either 10 mg/ml dispase (Sigma-Aldrich) or 2.5 mg/ml trypsin (Sigma-Aldrich) when separation of epidermis was required. All experimental protocols were in accordance with and approved by the Guide of Care of Experimental Animals of the KU Leuven Ethical Committee (license number 053/2018).

### Skin-barrier assays

For embryo whole-mount dye-penetration assays, embryos were dissected at E16.5 or E18.5, sacrificed, rinsed in PBS and quickly dehydrated and rehydrated through immersion in consecutively 25, 50, 75, 100, 75, 50 and 25% methanol, and subsequently rinsed in PBS. Staining was performed by immersion of the embryos in 0.1% toluidine blue (Fluka) in PBS

for 2 minutes. The embryos were destained in PBS at pH 7.4. The barrier function was evaluated based on the degree of dye penetration (Hardman et al. 1998). Transepidermal water loss (TEWL) was measured with the DermaLab® device (Cortex Technology). Briefly, the back skin of 8-week-old mice was shaved one day before measurements were started. TEWL measurements were always performed in the afternoon and in the same assessment room without air circulation. Room temperature (mean = 20.6°C, SD = 0.4, n=3) and humidity (mean = 62.1%, SD = 4.3; n=3) were registered before recording. For each mouse, three regions were measured in triplicate and the mean value for each region was calculated.

### **Assessment of scratching behaviour**

Mice were monitored for 10 minutes with a camera and afterwards the number of scratch events during this time period was counted. The total scratch time during 10 minutes was also measured.

### **Wound-healing assay**

Mice were anaesthetized with isoflurane and hair on their back skin was removed. Mice were taped on their ventral side on a heating pad. The area between the shoulders was disinfected with 2% iodine-alcohol and a piece of skin was removed with the 5-mm Stiefel biopsy punch (05.SF004.11/08). Histoacryl (Braun) was put on one side of an 8-mm silicone ring (Thermo Fisher Scientific) to tape the ring to the skin around the skin wound, and the ring was sutured to the skin using 6.0 prolene. Next, a drop of 0.9% NaCl was put in the wound to prevent it from drying out and the wound was covered with tegaderm film (Health Care). Mice were housed individually during the course of the experiment. On days 3, 6, 8 and 10 after wounding, mice were sedated with isoflurane and the tegaderm film was removed in order to take a picture of the wound. One phase exponential decay modelling in GraphPad Prism version 7 was used to compare the wound healing process between CTR and SKO mice.

### **EdU proliferation assay**

Pups of 10 days were intraperitoneally injected with 100  $\mu$ l of 6.25 mg/ml 5-ethynyl-2'-deoxyuridine (EdU) every 12 hours for a total of 4 injections and imaged using the Click-iT® EdU Alexa Fluor® 488 Imaging Kit (Thermo Fisher Scientific). Skin samples were collected 77 days after the last injection. Epidermal tail sections were prepared for wholemount staining as described previously (Liakath-Ali et al. 2014). Back skin sections were fixed in PBS containing 4% formaldehyde, embedded in paraffin and sections of 5  $\mu$ m were stained. EdU detection was performed as described by the manufacturer and by Mead *et al.* 2014 (Mead and Lefebvre 2014). Microscopy was carried out using a Leica DMI 4000B microscope and images were processed with ImageJ software (National Institute of Health).

### **Dexamethasone treatment**

Mice were intraperitoneally injected daily, for 15 consecutive days, with 4 mg/kg rapidexon/dexamethasone (Eurovet Animal Health, Dechra) or vehicle (saline). After this period, mice were sacrificed and skin tissue was used for immunohistochemical and qRT-PCR analysis.

### **Flow cytometry**

To analyze HFSCs and BECs, flow cytometry analysis was performed as described previously (Jensen et al. 2010; Moestrup et al. 2017), with some minor modifications. Briefly, tail skin pieces were incubated overnight at 4°C with 10 mg/ml dispase (Sigma-Aldrich), and subsequently for 1h at 37°C in 2.5 mg/ml trypsin (Gibco). After separating the epidermis from the underlying dermis, single cells from the epidermis were released into suspension by breaking tissue fragments in 2.5 mg/ml trypsin (Gibco) and passing through 70- $\mu$ m cell strainers (VWR international). Next, cells were counted and pelleted at 500 g for 8 minutes. Cells were stained with fluorescently labeled antibodies (APC-ITGA6, PE-CD34, PE/Cy7-CD45, PE/Cy7-CD31) for 1h at 0°C, washed twice with FACS buffer (PBS supplemented with 0.1% BSA) and analyzed in a BD FACSCanto II or sorted in a BD FACSAriaII (FACS core

facility, KU Leuven). Compensation was achieved by using UltraComp eBeads (Thermo Fisher Scientific). Expression of cell surface markers was analyzed on living cells after exclusion of cell doublets, CD45/CD31-positive cells and dead cells using propidium iodide (Thermo Fisher Scientific). The purity of the sorted cell populations was verified by post-sort analysis.

To analyze immune cells in the skin, flow cytometry was performed as described previously (Lay et al. 2018), with some minor adaptations. Briefly, tail skin was minced into small pieces and incubated for 75 min at 37°C in RPMI-1640 medium with L-glutamine and sodium bicarbonate (Sigma-Aldrich), supplemented with 5% FBS, 120 µg/ml Liberase TM (Roche) and 600 µg/ml DNaseI (Roche). Washing buffer containing HBSS (Gibco) and 20% FCS was added to stop the digestion. The skin pieces were squeezed through a 70-µm cell strainer (VWR international), counted and pelleted at 500 g for 8 minutes. Cells were stained with antibodies, including AF488-CD45, BV711-MHCII, BV605-CD11c, PE/Cy7-CD64, BUV395-CD11b, PE-CD207. Next, cells were fixed using the eBioscience Foxp3 fixation/permeabilization buffer (Thermo Fisher Scientific) and resuspended in PBS supplemented with 2.5% FCS. Dead cells were excluded by using the eF780 fixable viability dye (Thermo Fisher Scientific). Compensation was achieved by using UltraComp eBeads (Thermo Fisher Scientific). Immune cells were analysed with the BD FACSymphony A3 (FACS core facility, KU Leuven).

To analyze T cell maturation and activation by flow cytometry, thymi and spleens of 4-week-old and 8-12-week-old CTR or SKO mice were homogenized and spleens underwent red blood cell lysis. After blocking with ChromPure mouse IgG (Jackson ImmunoResearch), one half of the thymocytes were stained with CD4-PE, CD8-Fitc, CD24-PerCP-eFluor710, Qa2-biotin, Foxp3-APC and Streptavidin-BV421. Mature single positive (SP) cells were defined as CD4<sup>SP</sup> or CD8<sup>SP</sup> CD24<sup>lo</sup>Qa-2<sup>hi</sup>, immature SP cells were defined as CD24<sup>hi</sup>Qa2<sup>lo</sup>, regulatory T-cells were identified as CD8-CD4<sup>+</sup>Foxp3<sup>+</sup>. The other half was depleted of CD8-SP cells and double positive (DP) cells using CD8-biotin and Streptavidin magnetic beads (Dynabeads

M280, Invitrogen) to enrich for double negative (DN) cells. Enriched cells were stained for Lineage-Fitc (CD4, CD11b, Gr1, CD19, CD49b, NK1.1, TCRgd, Ter119, Streptavidin-Fitc), CD25-PerCP-Cy5.5 and CD44-PE. Lineage-negative developmental stages were defined as follows: DN1 CD25-CD44+, DN2 CD25+CD44+, DN3 CD25+CD44-, CD4 CD25-CD44-. Total splenocytes were stained for CD4-Fitc, CD8-APC-Cy7, CD44-biotin/Streptavidin-BV421, CD62L-PE and Foxp3-APC. Naïve CD4 and CD8 T cells were defined as CD62L+CD44-/lo, activated CD4 and CD8 T cells as CD62L-CD44hi, and effector-memory CD4 and CD8 T cells as CD62L+CD44hi. Data of all flow cytometry experiments were analyzed using FlowJo software. The antibodies for flow cytometry are described in **Table S2**.

### **RNA-sequencing**

Total RNA was isolated from 40 mg of snap-frozen tail epidermis from 4 CTR and 4 SKO mice (age of 8 weeks), using the GenElute™ Mammalian Total RNA Miniprep kit (Sigma-aldrich). RNA integrity of the samples used for RNA sequencing was assessed using a Bioanalyser 2100 (Agilent). Library preparation, sequencing and statistical analysis of the RNA sequencing data were performed by the VIB Nucleomics Core ([www.nucleomics.be](http://www.nucleomics.be)), according to their standard protocols, as detailed in (Ferreira et al. 2017). All gene expression data are available at GEO under accession number GSE116844 <https://www.ncbi.nlm.nih.gov/geo/query/acc.cgi?acc=GSE116844>.

### **Histological and immunohistochemical analysis**

Skin tissue was immediately fixed in PBS containing 4% formaldehyde, and embedded in paraffin at the Histology & Imaging facility (Vesalius Research Center, KU Leuven). Skin sections of 5 µm were stained with hematoxylin and eosin (H&E). For cryosections, skin tissue was fixed in PBS containing 4% formaldehyde for 20 minutes, washed twice with ammoniumchloride and incubated with 30% sucrose overnight at 4°C. The next day, the tissue was embedded in Tissue-Tek® O.C.T. Compound (Sakura). Skin sections of 10 µm were cut



with a Cryostat NX70 at the Histology & Imaging facility (Vesalius Research Center, KU Leuven). Wholmount stainings on tail skin section were prepared and performed as described previously (Liakath-Ali et al. 2014). The antibodies used for immunohistochemistry are described in **Table S2**. Microscopy was carried out using a Nikon A1R confocal, a Leica DMI 4000B, or a Leica DMBL, and images were processed with NIS Elements (Nikon Instruments) or Leica MM AF software or Leica IM50 Image Manager, respectively. Images were analyzed using ImageJ (National Institute of Health) or Icy software (Institut Pasteur, Paris, France).

### **Protein extraction**

Epidermal lysates were made in a modified RIPA buffer containing 50 mM Tris-HCl at pH 7.5, 0.3 M NaCl, 0.5% Triton X-100, 0.2% Sodium dodecyl sulfate (SDS), 1 mM EDTA, and 0.2% sodium deoxycholate. The buffer was supplemented with protease inhibitors (1 mM phenylmethanesulfonyl fluoride, 1 mM benzamidine, 5  $\mu$ M leupeptin) and protein phosphatase inhibitors (25 mM sodium fluoride, 1 mM orthovanadate). Samples were first incubated for 20 minutes on ice, and then homogenized with both a polytron blender and a Potter-Elvehjem homogenizer. Samples were incubated for 20 minutes on ice and centrifuged for 3 minutes at 11,000 *g*. The supernatant was collected and the pellet was resuspended in a buffer containing 50 mM Tris-HCl at pH 7.5, supplemented with 1.5 mM CaCl<sub>2</sub> and protease inhibitors (1 mM phenylmethanesulfonyl fluoride, 1 mM benzamidine, 5  $\mu$ M leupeptin) and protein phosphatase inhibitors (25 mM sodium fluoride, 2 mM orthovanadate), and treated with 90 units of micrococcal nuclease for 30 minutes at 37°C. These lysates were centrifuged for 5 minutes at 1,700 *g* and the supernatants were retained. Both supernatant fractions were pooled and processed for SDS-PAGE and immunoblotting. Proteins were blotted on polyvinylidene fluoride membranes (GE Healthcare) and probed with various antibodies (**Table S2**). Immunoblots were visualized using ECL reagent (Perkin Elmer, Life Sciences) in the

ImageQuant LAS4000 imaging system (GE Healthcare) and were quantified using ImageQuant TL Software (GE Healthcare).

### **Cell culture**

HaCaT cells were cultured in DMEM medium with 4.5 g/L glucose and 2 mM L-glutamine (Sigma-Aldrich), supplemented with 1 mM sodium pyruvate (Sigma-Aldrich), 10% FCS and 1% Penicillin/Streptomycin. siRNA duplexes against human NIPPI1 (stealth siRNA NIPPI1, sequence: GGAACCUCACAAGCCUCAGCAAUU) and the non-targeting control (stealth control, scrambled version of stealth siRNA NIPPI1, sequence: GGAACUCGAACCUCCACGAACAAUU) were purchased from Thermo Fisher Scientific. The siRNA transfections were performed using RNAiMAX transfection reagent (Thermo Fisher Scientific). For MTT assays, 20,000 HaCaT cells were seeded in each well of a 48-well plate and knockdowns were performed as described above. 0.4 mg/ml of 3-(4,5-Dimethylthiazol-2-yl)-2,5-diphenyltetrazolium bromide (MTT) was added to each well after 24h, 48h, 72h and 96h knockdown. After 1h of incubation, the medium was removed and the purple crystals were dissolved in DMSO. The absorbance was measured at 550 nm. For viability assays, 12,000 HaCaT cells were seeded into 96-well plates and knockdowns were performed as described above. Cell confluence was automatically monitored by the IncuCyte (Essen BioScience) for 90h. For the IncuCyte scratch wound assay, HaCaT cells (60,000 cells/well) were seeded onto collagen-I-coated 96-well ImageLock tissue culture plates (Essen BioScience), knockdowns were performed as described above and the plates were incubated in a standard CO<sub>2</sub> incubator for 24h to form cell monolayers. Wounds were made with the 96-well WoundMaker (Essen BioScience). The wounded cells were washed twice with culture medium to remove the detached cells and then 100µl of medium was added per well. Images of the wounds were automatically acquired within the CO<sub>2</sub> incubator by IncuCyte zoom software (Essen BioScience). Kinetic updates were taken at 2h-intervals for 96h. The data were analysed

with respect to wound confluence and calculated by using the IncuCyte software package (Essen BioScience).

### **Quantitative Reverse Transcriptase (qRT) - PCR**

Total RNA was isolated from snap-frozen mouse epidermis, dermis, FACS-purified BECs or from HaCaT cells (stored at  $-80^{\circ}\text{C}$ ) using the Genelute Mammalian Total RNA Miniprep kit (Sigma-Aldrich). Total RNA from snap-frozen FACS-purified HFSCs (stored at  $-80^{\circ}\text{C}$ ) was isolated using the RNeasy Plus Micro Kit (Qiagen). Complementary DNA (cDNA) was synthesized from 200 ng (minimum) and 2  $\mu\text{g}$  (maximum) of total RNA using oligo (dT) primers (Sigma-Aldrich), RevertAid Premium Reverse Transcriptase and RiboLock RNase inhibitor enzymes (Fermentas). 1.2% of the cDNA was PCR-amplified in duplicate using SYBR Green qPCR Mix (Invitrogen) and a Rotorgene detection system (Corbett Research) (Boens et al. 2016). To determine the relative amount of target in different samples, all values were normalized to the housekeeping gene *Hprt* (Hypoxanthine-guanine phosphoribosyltransferase). All used qRT-PCR primers can be found in **Table S3**.

### **Data analysis**

The results are expressed as means  $\pm$  standard deviation (SD) and analyzed with the unpaired Student t-test. The wound healing process between CTR and SKO mice was compared by one phase exponential decay modelling and the difference between the fit of the curves was determined by the Mann-Whitney test. Statistical analysis was performed in GraphPad Prism version 7 (GraphPad software, Inc). All data from qPCR analysis and Western blot analysis are shown as a fold change, i.e. SKO values relative to one CTR. The value of the other CTR samples was also expressed relative to this CTR value to show the variation between the CTR samples. For the analysis of the ITGA6 and ITGB4 staining, intensity values of CTR and SKO samples were calculated with Icy. The mean value of all CTR intensity values was calculated. Next, all intensity values of CTR and SKO samples were normalized to this 'mean CTR

intensity value'. In both wholemount sections (ITGA6) and 2D sections (ITGB4) the intensity values in IFE were quantified.

#### **SUPPLEMENTARY REFERENCES**

Boens S, Verbinnen I, Verhulst S, Szekér K, Ferreira M, Gevaert T, et al. Brief Report: The Deletion of the Phosphatase Regulator NIPP1 Causes Progenitor Cell Expansion in the Adult Liver. *Stem Cells*. 2016;34(8):2256–62

Ferreira M, Boens S, Winkler C, Szekér K, Verbinnen I, Van Eynde A, et al. The protein phosphatase 1 regulator NIPP1 is essential for mammalian spermatogenesis. *Sci. Rep.* 2017;7(1)

Hardman MJ, Sisi P, Banbury DN, Byrne C. Patterned acquisition of skin barrier function during development. *Development*. 1998;125(8):1541–52

Jensen KB, Driskell RR, Watt FM. Assaying proliferation and differentiation capacity of stem cells using disaggregated adult mouse epidermis. *Nat. Protoc.* 2010;5(5):898–911

Lay K, Yuan S, Gur-Cohen S, Miao Y, Han T, Naik S, et al. Stem cells repurpose proliferation to contain a breach in their niche barrier. *Elife*. 2018;7

Liakath-Ali K, Vancollie VE, Heath E, Smedley DP, Estabel J, Sunter D, et al. Novel skin phenotypes revealed by a genome-wide mouse reverse genetic screen. *Nat. Commun.* 2014;5

Mead TJ, Lefebvre V. Proliferation assays (BrdU and EdU) on skeletal tissue sections. *Methods Mol. Biol.* 2014;1130:233–43

Moestrup KS, Andersen MS, Jensen KB. Isolation and in vitro characterization of epidermal stem cells. *Methods Mol. Biol.* 2017. p. 67–83

Vasioukhin V, Degenstein L, Wise B, Fuchs E. The magical touch: genome targeting in

epidermal stem cells induced by tamoxifen application to mouse skin. Proc Natl Acad Sci U S A. 1999;96(15):8551–6

**SUPPLEMENTARY TABLE S1: primers for genotyping.**

| <b>Target</b>                              | <b>Sense Primer</b>                                         | <b>Antisense Primer</b>                                      |
|--------------------------------------------|-------------------------------------------------------------|--------------------------------------------------------------|
| K14-CRE<br>recombinase                     | CTTGCGAACCTCATCACTCG                                        | AGGGATCTGATCGGGAGTTG                                         |
| NIPP1 fl/fl<br>- Neodelet<br>ion<br>- LoxP | CCACCCTCTCCTTTACTTTGT<br>CTTC<br>CTTACAAGGAGTGGTATTTCG<br>A | GGAGAGGAGTAATGAGGAGT<br>TGTG<br>ACTGTCTAGCAGGGCATAGTG<br>TTG |
| NIPP1 knockout                             | CCTCAGCAGATAGCCCACG<br>G                                    | CGCATCGCCTTCTACGCCTTCT<br>TGAC                               |

**SUPPLEMENTARY TABLE S2: antibodies.**

| <b>Target protein</b>                     | <b>Company</b>           | <b>Application</b> |
|-------------------------------------------|--------------------------|--------------------|
| CD34-PE (clone RAM 34)                    | BD Pharmingen            | FC                 |
| ITGA6-APC (clone GoH3)                    | Thermo Fisher Scientific | FC                 |
| CD45-PE/Cy7 (clone 30-F11)                | BioLegend                | FC                 |
| CD31-PE/Cy7 (clone 390)                   | BD Pharmingen            | FC                 |
| CD45-AF488 (clone 30-F11)                 | BioLegend                | FC                 |
| MHCII (I-A/I-E)-BV711 (clone M5/114.15.2) | BioLegend                | FC                 |
| CD11c-BV605 (clone N418)                  | BioLegend                | FC                 |
| CD64-PE/Cy7 (clone X54-5/7.1)             | BioLegend                | FC                 |
| CD11b-BUV395 (BD Horizon) (clone M1/70)   | BD Biosciences           | FC                 |
| CD207-PE (clone 4C7)                      | BioLegend                | FC                 |
| CD4-Fitc                                  | eBioscience              | FC                 |
| CD4-PE (clone GK1.1)                      | eBioscience              | FC                 |
| CD8-Fitc                                  | eBioscience              | FC                 |
| CD8-APC-eFluor780 (clone 53-6.7)          | eBioscience              | FC                 |
| CD11b (clone M2/70)                       | eBioscience              | FC                 |
| Gr1 (clone RB6-8C5)                       | eBioscience              | FC                 |
| CD19 (clone 1D3)                          | eBioscience              | FC                 |
| CD49b (clone DX5)                         | eBioscience              | FC                 |
| NK1.1 (clone PK136)                       | eBioscience              | FC                 |
| TCRgd (clone GL3)                         | eBioscience              | FC                 |
| Ter119 (clone Ter-119)                    | eBioscience              | FC                 |
| Streptavidin-Fitc                         | eBioscience              | FC                 |
| CD62L-PE (clone MEL-14)                   | eBioscience              | FC                 |
| CD44-PE                                   | eBioscience              | FC                 |
| CD44-biotin (clone IM7)                   | eBioscience              | FC                 |
| Foxp3-APC (clone FJK-16s)                 | eBioscience              | FC                 |
| CD24-PerCP-eFluor710 (clone M1/69)        | eBioscience              | FC                 |
| CD25-PerCP-Cy5.5 (clone PC-61.5)          | eBioscience              | FC                 |
| Streptavidin-BV421                        | BioLegend                | FC                 |
| Qa2-biotin (clone 1-1-2)                  | BD Pharmingen            | FC                 |
| NIPP1                                     | Sigma-Aldrich            | IHC                |

|                                                                               |                                        |           |
|-------------------------------------------------------------------------------|----------------------------------------|-----------|
| Ki67 (clone SP6)                                                              | Abcam                                  | IHC       |
| H3S10ph (clone MC463)                                                         | Upstate Biotechnology                  | IHC       |
| BrdU                                                                          | Dako                                   | IHC       |
| Keratin-14 (clone LL002)                                                      | Abcam                                  | IHC       |
| Keratin-10 (clone Poly19054)                                                  | BioLegend                              | IHC       |
| Keratin-1 (clone Poly19056)                                                   | BioLegend                              | IHC       |
| Filaggrin                                                                     | Santa Cruz Biotechnology               | IHC       |
| Loricrin (clone Poly19051)                                                    | BioLegend                              | IHC       |
| Integrin- $\alpha$ 6-FITC (clone GoH3)                                        | BioLegend                              | Wholemout |
| Integrin- $\beta$ 4 (clone 346-11A)                                           | BD Pharmingen                          | IHC       |
| Directly conjugated (Alexa Fluor 555) Keratin-14 (clone LL002)                | Lab Fiona Watt (King's College London) | Wholemout |
| Directly conjugated (Alexa Fluor 488) Keratin-15 (clone LHK-15)               | Lab Fiona Watt (King's College London) | Wholemout |
| FASN (clone G-11)                                                             | Santa Cruz Biotechnology               | Wholemout |
| Ki67 (NCL-Ki67p)                                                              | Novacastra                             | Wholemout |
| CD45 (clone 30-F11)                                                           | BD Biosciences                         | IHC       |
| Sox9                                                                          | Millipore                              | IHC       |
| CD34 (clone RAM34)                                                            | Thermo Fisher Scientific               | IHC       |
| E-Cadherin (clone 24E10)                                                      | Cell Signaling Technology              | IHC       |
| CD117 (clone ACK2)                                                            | Thermo Fisher Scientific               | IHC       |
| Alexa Fluor 488 goat anti-rabbit IgG (H+L)                                    | Invitrogen                             | IHC       |
| Alexa Fluor 488 donkey anti-mouse IgG (H+L)                                   | Invitrogen                             | IHC       |
| Alexa Fluor 568 goat anti-mouse IgG (H+L)                                     | Invitrogen                             | IHC       |
| Goat anti-Rat IgG (H+L) Cross-Adsorbed Secondary Antibody, Alexa Fluor 488    | Invitrogen                             | IHC       |
| Goat anti-Rabbit IgG (H+L) Cross-Adsorbed Secondary Antibody, Alexa Fluor 546 | Invitrogen                             | IHC       |
| Swine anti-rabbit HRP                                                         | Dako                                   | IHC + WB  |
| Anti-mouse HRP                                                                | Dako                                   | IHC + WB  |
| NIPP1                                                                         | Van Eynde et al. 2004                  | WB        |
| GAPDH                                                                         | Cell Signaling Technology              | WB        |

FC: flow cytometry; IF: immunohistochemistry; WB: western blot



**SUPPLEMENTARY TABLE S3: RT-qPCR primers.**

| <b>Gene</b>   | <b>Sense Primer</b>              | <b>Antisense Primer</b>          |
|---------------|----------------------------------|----------------------------------|
| <i>Ccl1</i>   | CCGTGTGGATACAGGATGTT             | GAAGCTCTTTCTTCAAGGTG TTC         |
| <i>Ccl2</i>   | CTGGAGCATCCACGTGTT               | GCCTACTCATTGGGATCATCTT           |
| <i>CCL2</i>   | TCATAGCAGCCACCTTCATTC            | CTCTGCACTGAGATCTTCCTATT<br>G     |
| <i>CCL20</i>  | CTCCTGGCTGCTTTGATGT              | GGATGAAGAATACGGTCTGTGT<br>AT     |
| <i>CCL22</i>  | GACTGCACTCCTGGTTGTC              | CAGACGCTGTCTTCCATGTT             |
| <i>CCL7</i>   | CTCTGCAGCACTTCTGTGT              | AAATCTGTAGCAGCAGGTAGTT           |
| <i>Cd34</i>   | ACCAGCCATCTCAGAGACTAT            | GTAGTAGGCAGTATGCCAGTTG           |
| <i>Cd45</i>   | TGCCTATGTCAATGGGAAGATT           | GGCCATTAGTTTCATAAGGAGG<br>A      |
| <i>Cxcl1</i>  | TTCACCTCAAGAACATCCAGAG           | AAGCCTCGCGACCATTC                |
| <i>CXCL1</i>  | GTGGCACTGCTGCTCCT                | AGGGTCTGCAAGCACTGG               |
| <i>CXCL10</i> | GCTGCCTTATCTTTCTGACTCT           | GACCTTGGATTAACAGGTTGATT<br>AC    |
| <i>CXCL16</i> | CCCATGGGTTTCAGGAATTGA            | GGCTGGTAGGAAGTAAATGCT            |
| <i>Cxcl2</i>  | TCAAGAACATCCAGAGCTTGAG           | CTTCAGGGTCAAGGCAA ACT            |
| <i>Dkk3</i>   | CCAGTTCTCCAGCTTCAAGTA            | CCACAGCACTCACTGTCTC              |
| <i>Flg</i>    | AGGAGGAAGAAACACTGAGCA            | AGTTTGT CATCGTGGTCCAC            |
| <i>Fzd2</i>   | TGCCGTCCTATCTCAGCTATAA           | CCTCTTGCGAGAAGAACATAGA<br>G      |
| <i>Hprt</i>   | CTGGTGAAAAGGACCTCTCG             | TGAAGTACATTATAGTCAAGGG<br>CA     |
| <i>HPRT</i>   | TGACACTGGCAAACAATGCA             | GGTCCTTTTCACCAGCAAGCT            |
| <i>Itga6</i>  | AAGGTTTGGAGCAGATTGTTT            | TTTCAGGAAGTTCCCGTTTCT            |
| <i>Itgb1</i>  | CAGCAACGCATATCTGGAAAC            | TACATTCCTCCAGCCAATCAG            |
| <i>Itgb4</i>  | GGATAATACAGCACACGGACA            | AGTAGCTTCACCTGCAACTC             |
| <i>Krt1</i>   | GACACCACAACCCGGACCCAAA<br>ACTTAG | ATACTGGGCCTTGACTTCCGAGA<br>TGATG |
| <i>Krt10</i>  | GGAGGGTAAAATCAAGGAGTG<br>GTA     | TCAATCTGCAGCAGCACGTT             |
| <i>Krt15</i>  | GCTCAGAACCAGGAGTACAAC            | AATACCAGCCATCTTAGCATC            |
| <i>Lor</i>    | TCACTCATCTTCCCTGGTGCTT           | GTCTTTCCACAACCCACAGGA            |
| <i>Mmp9</i>   | CAGCCA ACTATGACCAGGATAA          | TCGCTGGTACAGGAAGAGTA             |
| <i>Nfatc1</i> | GGCGGGAAGAAGATGGTGCTGT<br>C      | TGGTTGCGGAAAGGTGGTATCTC<br>A     |
| <i>Ppp1r8</i> | TACATCTGGATGTGGTGAAAGG           | GGTCGATAGTGAAGTCACACAG           |

|               |                       |                                |
|---------------|-----------------------|--------------------------------|
| <i>PPP1R8</i> | TACACACGGCACTTTCTTGG  | CTTGTTGTGGGCAGTGTTGA           |
| <i>S100a8</i> | AAATCACCATGCCCTCTACAA | CACTATTGATGTCCAATTCTCTG<br>AAC |
| <i>Sox9</i>   | CTCTGGAGGCTGCTGAAC    | CGCTTGTCCGTTCTTCAC             |
| <i>Tnf</i>    | TCTTCTGTCTACTGAACTTCG | GGCCATAGAACTGATGAGAG           |

**SUPPLEMENTARY TABLE S4: Differentially expressed genes (DEGs) SKOvsCTR (FDR<0.01, two-fold cut-off).**

| <b>Gene name</b>     | <b>SKOvsCTR : logFC</b> | <b>SKOvsCTR : FDR</b> |
|----------------------|-------------------------|-----------------------|
| <i>Ccl2</i>          | 5.569476383             | 2.4143E-32            |
| <i>Cdkn2a</i>        | 5.323965457             | 3.00611E-12           |
| <i>Stfa1</i>         | 5.300138712             | 2.58015E-05           |
| <i>Defb5</i>         | 5.182281401             | 1.72299E-14           |
| <i>Ccl1</i>          | 4.96704325              | 2.31247E-33           |
| <i>S100a9</i>        | 4.622518139             | 1.43652E-10           |
| <i>Ccl20</i>         | 4.228922878             | 4.66147E-23           |
| <i>Gm5416</i>        | 4.181110723             | 1.11493E-10           |
| <i>S100a8</i>        | 4.174235752             | 5.45686E-11           |
| <i>Pglyrp2</i>       | 4.100906903             | 5.13833E-45           |
| <i>Tslp</i>          | 4.041658227             | 7.9062E-12            |
| <i>Krt6b</i>         | 4.034168573             | 9.65337E-27           |
| <i>Ascl3</i>         | 3.98618632              | 7.65471E-11           |
| <i>Krt4</i>          | 3.675455067             | 6.83376E-12           |
| <i>Ch25h</i>         | 3.599877533             | 9.73667E-06           |
| <i>Lce3b</i>         | 3.480519056             | 1.73387E-10           |
| <i>Tas1r2</i>        | 3.450724354             | 6.71019E-14           |
| <i>Blk</i>           | 3.385207475             | 9.2625E-09            |
| <i>Lce3a</i>         | 3.346668465             | 1.95337E-14           |
| <i>Gm5478</i>        | 3.336928673             | 0.007283311           |
| <i>Axdnd1</i>        | 3.276457843             | 1.82696E-14           |
| <i>B3gnt3</i>        | 3.220092241             | 0.000611605           |
| <i>Cxcl10</i>        | 3.2093752               | 1.16146E-08           |
| <i>Tnfsf4</i>        | 3.157810331             | 8.93336E-05           |
| <i>Rgs4</i>          | 3.124274678             | 0.000265427           |
| <i>Icos</i>          | 3.025441396             | 0.000115095           |
| <i>Cxcl9</i>         | 2.988683416             | 0.000689781           |
| <i>2610528A11Rik</i> | 2.985216942             | 1.20186E-17           |
| <i>Stfa2</i>         | 2.940976351             | 1.34879E-10           |
| <i>Il2rg</i>         | 2.924128947             | 5.27519E-08           |
| <i>5830411N06Rik</i> | 2.918900573             | 1.60793E-11           |
| <i>Ltb</i>           | 2.917122347             | 7.03577E-06           |
| <i>Ccr2</i>          | 2.906344841             | 2.25655E-08           |
| <i>Epb42</i>         | 2.879079741             | 8.41099E-07           |
| <i>Gbp2</i>          | 2.861369161             | 1.03382E-06           |
| <i>Cxcl1</i>         | 2.837231096             | 7.51794E-07           |
| <i>Il18r1</i>        | 2.821486218             | 1.32664E-17           |
| <i>Ccl7</i>          | 2.818406405             | 0.000224406           |
| <i>Cyp7b1</i>        | 2.791610531             | 3.23083E-15           |
| <i>Ppp1r1c</i>       | 2.790473732             | 1.1543E-05            |
| <i>Cd247</i>         | 2.7702066               | 6.69687E-06           |
| <i>Lce3e</i>         | 2.694939684             | 9.33271E-11           |

|                      |             |             |
|----------------------|-------------|-------------|
| <i>Slit1</i>         | 2.67632118  | 1.90976E-20 |
| <i>Rac2</i>          | 2.667771175 | 0.000117646 |
| <i>Igsf6</i>         | 2.640476991 | 1.96569E-05 |
| <i>Usp18</i>         | 2.629431714 | 0.005030302 |
| <i>Cd3e</i>          | 2.608574217 | 1.26872E-05 |
| <i>Ctsk</i>          | 2.583007451 | 0.00012796  |
| <i>Slc38a5</i>       | 2.57975073  | 0.001614665 |
| <i>Stfa3</i>         | 2.57083166  | 1.959E-06   |
| <i>Gja4</i>          | 2.569933305 | 1.40419E-20 |
| <i>Uba7</i>          | 2.550012073 | 2.18727E-07 |
| <i>Lrrc9</i>         | 2.528480774 | 1.19267E-06 |
| <i>Ambp</i>          | 2.485060346 | 1.85096E-07 |
| <i>Defb3</i>         | 2.441766769 | 0.002668362 |
| <i>Lce3f</i>         | 2.440722527 | 1.4021E-09  |
| <i>Il18rap</i>       | 2.43188571  | 6.72608E-06 |
| <i>Lce3d</i>         | 2.388781333 | 1.12703E-05 |
| <i>Scimp</i>         | 2.386576715 | 8.88112E-05 |
| <i>Ttc34</i>         | 2.382470284 | 4.74269E-07 |
| <i>Pkd2l1</i>        | 2.372923628 | 1.50725E-10 |
| <i>Lrrn4cl</i>       | 2.369208318 | 5.06046E-08 |
| <i>Tnf</i>           | 2.364621827 | 2.13605E-06 |
| <i>Adgrg3</i>        | 2.341667611 | 1.02947E-17 |
| <i>Slc16a3</i>       | 2.331840536 | 3.83735E-22 |
| <i>Sash3</i>         | 2.310013073 | 0.000365201 |
| <i>Pmaip1</i>        | 2.270588654 | 7.92366E-09 |
| <i>Ankk1</i>         | 2.259416444 | 6.43301E-06 |
| <i>Fxyd1</i>         | 2.259224343 | 0.002112139 |
| <i>Tmem132b</i>      | 2.246987296 | 2.49969E-07 |
| <i>1700012P22Rik</i> | 2.235049877 | 1.66028E-18 |
| <i>Lax1</i>          | 2.231451207 | 2.10887E-20 |
| <i>Mmp9</i>          | 2.21669885  | 2.68206E-10 |
| <i>Sult4a1</i>       | 2.189872386 | 1.44229E-06 |
| <i>Slc2a6</i>        | 2.163465871 | 5.59804E-05 |
| <i>Pld4</i>          | 2.142267156 | 0.000216944 |
| <i>Lpo</i>           | 2.129146636 | 0.000473135 |
| <i>Pik3r5</i>        | 2.123616919 | 9.82959E-05 |
| <i>Guca2b</i>        | 2.116846777 | 2.82447E-08 |
| <i>Lcn2</i>          | 2.114326884 | 3.1714E-10  |
| <i>Mfrp</i>          | 2.107802037 | 1.74864E-05 |
| <i>Hgfac</i>         | 2.071972951 | 0.008151816 |
| <i>Slpi</i>          | 2.062517659 | 5.56526E-12 |
| <i>Gm9905</i>        | 2.039170455 | 1.05286E-10 |
| <i>Ankmy1</i>        | 2.037680573 | 2.28595E-07 |
| <i>Casp4</i>         | 2.037305091 | 0.000272302 |

|                      |             |             |
|----------------------|-------------|-------------|
| <i>Artn</i>          | 2.033294683 | 2.40136E-07 |
| <i>Casp12</i>        | 2.031322192 | 0.002545135 |
| <i>Mxl</i>           | 1.989569898 | 9.55259E-05 |
| <i>Apol8</i>         | 1.986408619 | 1.3239E-08  |
| <i>Rgs18</i>         | 1.980949482 | 1.26271E-05 |
| <i>Prl2c5</i>        | 1.971858905 | 0.001020909 |
| <i>Zfp423</i>        | 1.970191747 | 0.000683254 |
| <i>Ecsr</i>          | 1.962364308 | 0.000623455 |
| <i>Cyp17a1</i>       | 1.961045691 | 7.08457E-34 |
| <i>Sp8</i>           | 1.960386478 | 4.17535E-06 |
| <i>Sprr2e</i>        | 1.940237644 | 6.43301E-06 |
| <i>Chga</i>          | 1.940190275 | 3.60766E-09 |
| <i>Gpr35</i>         | 1.932102412 | 4.93457E-26 |
| <i>Spink14</i>       | 1.914599782 | 7.27657E-05 |
| <i>Arl9</i>          | 1.89873438  | 0.001470661 |
| <i>Chil1</i>         | 1.892729004 | 9.6825E-13  |
| <i>Vsnl1</i>         | 1.886332444 | 6.53537E-06 |
| <i>Dlgap1</i>        | 1.879269433 | 1.76319E-10 |
| <i>0610009L18Rik</i> | 1.87490405  | 4.73939E-10 |
| <i>Lif</i>           | 1.870071066 | 4.10946E-07 |
| <i>Il7r</i>          | 1.867356535 | 1.58689E-08 |
| <i>Scd3</i>          | 1.851224436 | 1.01996E-10 |
| <i>Iyd</i>           | 1.837991722 | 0.000664947 |
| <i>Phf11d</i>        | 1.82046899  | 0.000498488 |
| <i>Gstm6</i>         | 1.818233335 | 4.13413E-07 |
| <i>Serpina6e</i>     | 1.814838497 | 0.006523674 |
| <i>Fetub</i>         | 1.810969395 | 9.01899E-16 |
| <i>Igfbp6</i>        | 1.809873893 | 7.83983E-09 |
| <i>Cxcr6</i>         | 1.801272371 | 1.44983E-05 |
| <i>Rptn</i>          | 1.793000091 | 2.61795E-07 |
| <i>Lce3c</i>         | 1.766498022 | 1.81088E-13 |
| <i>C1qtnf1</i>       | 1.737118642 | 2.49969E-07 |
| <i>Dnmt3l</i>        | 1.733529328 | 0.007214623 |
| <i>Prr22</i>         | 1.732985188 | 5.40831E-05 |
| <i>Gsta4</i>         | 1.721945611 | 0.000788107 |
| <i>Dock2</i>         | 1.719123784 | 0.000113138 |
| <i>Nlrc5</i>         | 1.710007555 | 9.31974E-21 |
| <i>Serpina3j</i>     | 1.682516956 | 0.005880725 |
| <i>Gm9958</i>        | 1.663378954 | 2.89553E-11 |
| <i>Fam105a</i>       | 1.644134291 | 2.44031E-12 |
| <i>Igtp</i>          | 1.643225564 | 1.33129E-07 |
| <i>Tekt2</i>         | 1.637897071 | 3.19803E-10 |
| <i>Tnnt2</i>         | 1.633166878 | 1.06004E-07 |
| <i>Cd52</i>          | 1.626022278 | 4.91084E-06 |

|                      |             |             |
|----------------------|-------------|-------------|
| <i>Avil</i>          | 1.607453913 | 1.76872E-06 |
| <i>Tmem116</i>       | 1.606229948 | 2.65307E-06 |
| <i>Sprr2d</i>        | 1.581103301 | 1.87372E-22 |
| <i>Pla2r1</i>        | 1.573835774 | 3.38585E-08 |
| <i>Acp1</i>          | 1.557569955 | 0.000261235 |
| <i>Gbp7</i>          | 1.555388084 | 7.57036E-05 |
| <i>Tmprss11d</i>     | 1.554846328 | 0.002565131 |
| <i>Rhoc</i>          | 1.549877124 | 4.9658E-08  |
| <i>Ccdc88b</i>       | 1.546309694 | 2.7261E-05  |
| <i>Fgr</i>           | 1.543307444 | 0.002954787 |
| <i>Krt1</i>          | 1.540248096 | 0.000161752 |
| <i>Hsd11b1</i>       | 1.539121421 | 0.003728367 |
| <i>Rltpr</i>         | 1.536677471 | 0.001873894 |
| <i>Tnfaip2</i>       | 1.534797859 | 6.41706E-22 |
| <i>Ppp2r2c</i>       | 1.531602156 | 0.001809933 |
| <i>Asb2</i>          | 1.525632733 | 9.73362E-07 |
| <i>Ets1</i>          | 1.524817188 | 2.04355E-13 |
| <i>Ccr1</i>          | 1.514548667 | 0.001077273 |
| <i>P2ry10</i>        | 1.51091329  | 0.002136684 |
| <i>Psmb9</i>         | 1.507861764 | 5.86659E-07 |
| <i>Casp1</i>         | 1.507006458 | 5.48495E-07 |
| <i>Atp6v1g2</i>      | 1.502597153 | 3.3679E-06  |
| <i>Slco2b1</i>       | 1.490041713 | 0.003241821 |
| <i>Oas1e</i>         | 1.489985095 | 0.002856819 |
| <i>Gbp2b</i>         | 1.485426612 | 0.003522974 |
| <i>Lix1l</i>         | 1.484545872 | 6.3643E-08  |
| <i>Vcam1</i>         | 1.481892988 | 0.000570118 |
| <i>Itgb7</i>         | 1.477629277 | 0.000424397 |
| <i>Krt16</i>         | 1.473964756 | 4.92006E-11 |
| <i>Psmb8</i>         | 1.468655102 | 4.8278E-13  |
| <i>Usp35</i>         | 1.466275909 | 2.43113E-05 |
| <i>Lppr2</i>         | 1.463648215 | 7.46973E-18 |
| <i>Gm12942</i>       | 1.463444105 | 6.47991E-08 |
| <i>Tmprss11b</i>     | 1.459772285 | 0.001052143 |
| <i>Fcgr2b</i>        | 1.459207252 | 0.000407716 |
| <i>Hsp90ab1</i>      | 1.458004795 | 3.07521E-09 |
| <i>Akt3</i>          | 1.451704949 | 0.000226061 |
| <i>Rinl</i>          | 1.450509541 | 0.000528965 |
| <i>Ptger1</i>        | 1.448562437 | 7.0429E-06  |
| <i>Lrrc32</i>        | 1.448338914 | 3.57313E-06 |
| <i>Il1f6</i>         | 1.447659593 | 3.27643E-10 |
| <i>A630023A22Rik</i> | 1.445492727 | 2.58015E-05 |
| <i>Adamts5</i>       | 1.445301362 | 2.32845E-12 |
| <i>Parp14</i>        | 1.4446802   | 2.12056E-10 |

|                      |             |             |
|----------------------|-------------|-------------|
| <i>4930524J08Rik</i> | 1.444065121 | 0.000905329 |
| <i>Fst</i>           | 1.442738865 | 2.5538E-14  |
| <i>Krt12</i>         | 1.441955562 | 0.005059335 |
| <i>Kcnip2</i>        | 1.435748087 | 0.000600696 |
| <i>Tnfrsf23</i>      | 1.431273359 | 2.44954E-10 |
| <i>Tas1r3</i>        | 1.424785092 | 0.008886589 |
| <i>Notch4</i>        | 1.421053645 | 0.000154891 |
| <i>Rp11l</i>         | 1.416874084 | 0.001606712 |
| <i>Elovl6</i>        | 1.404519588 | 0.000901933 |
| <i>Ano7</i>          | 1.395070174 | 4.01417E-06 |
| <i>BC100530</i>      | 1.38835095  | 1.51921E-06 |
| <i>Far2</i>          | 1.383858746 | 0.002195101 |
| <i>B2m</i>           | 1.379895788 | 9.01899E-16 |
| <i>Slc7a3</i>        | 1.379284788 | 0.005276774 |
| <i>Coro1a</i>        | 1.378541738 | 4.59076E-06 |
| <i>1190005I06Rik</i> | 1.372988758 | 0.006396701 |
| <i>Enho</i>          | 1.371719648 | 0.000477978 |
| <i>Defb6</i>         | 1.371479895 | 3.58449E-07 |
| <i>Stab1</i>         | 1.371439591 | 1.55919E-11 |
| <i>Zmat1</i>         | 1.370486036 | 0.002338956 |
| <i>Dok3</i>          | 1.366888127 | 0.000102213 |
| <i>Sprr2i</i>        | 1.361525327 | 1.89933E-11 |
| <i>Klf2</i>          | 1.36067873  | 0.000463746 |
| <i>Ptges</i>         | 1.360132801 | 9.31974E-21 |
| <i>Hist2h3c2</i>     | 1.35990535  | 0.000698934 |
| <i>Vim</i>           | 1.353953652 | 4.24932E-14 |
| <i>Mgarp</i>         | 1.352088069 | 2.51841E-06 |
| <i>Dlg4</i>          | 1.3517709   | 0.001154768 |
| <i>Irgm2</i>         | 1.342003782 | 7.74323E-05 |
| <i>Tdrd5</i>         | 1.332225688 | 4.05864E-05 |
| <i>Fmnl1</i>         | 1.32454261  | 7.65839E-05 |
| <i>Cidec</i>         | 1.323611973 | 0.002388529 |
| <i>Gsdmd</i>         | 1.318862445 | 0.000324693 |
| <i>Tmigdl</i>        | 1.31691345  | 0.000196605 |
| <i>Lce1k</i>         | 1.314200611 | 3.06696E-06 |
| <i>Agap2</i>         | 1.306816594 | 1.94059E-09 |
| <i>Eda2r</i>         | 1.304064289 | 1.58951E-10 |
| <i>Serpib3a</i>      | 1.290171397 | 5.71963E-09 |
| <i>Tmem240</i>       | 1.288276346 | 0.006223369 |
| <i>Tbkbpl</i>        | 1.286445136 | 6.95766E-05 |
| <i>Ctss</i>          | 1.281983114 | 2.32335E-05 |
| <i>Kremen2</i>       | 1.279217838 | 8.88012E-10 |
| <i>H2-M2</i>         | 1.274909293 | 0.000193521 |
| <i>Serpib1a</i>      | 1.274715146 | 3.19516E-10 |

|                      |             |             |
|----------------------|-------------|-------------|
| <i>Zmynd15</i>       | 1.272161815 | 0.000172857 |
| <i>Plod1</i>         | 1.266502641 | 3.19516E-10 |
| <i>Fgfbp3</i>        | 1.261790006 | 1.8243E-10  |
| <i>Cdhr1</i>         | 1.261524428 | 0.001208473 |
| <i>C1rl</i>          | 1.253907743 | 1.23164E-05 |
| <i>Rnf224</i>        | 1.236063447 | 8.93336E-05 |
| <i>Rbp1</i>          | 1.235442685 | 1.45781E-16 |
| <i>Kcnab2</i>        | 1.232263077 | 0.001323203 |
| <i>Isg15</i>         | 1.229937075 | 0.004799382 |
| <i>Rasl10a</i>       | 1.213770978 | 6.42124E-05 |
| <i>Gm38119</i>       | 1.211897505 | 0.00045725  |
| <i>Hap1</i>          | 1.211340561 | 2.70921E-10 |
| <i>Lag3</i>          | 1.209502858 | 0.000265427 |
| <i>Fam174b</i>       | 1.209458227 | 0.001706874 |
| <i>4921536K21Rik</i> | 1.203229802 | 1.2284E-05  |
| <i>Oat</i>           | 1.202028834 | 1.7847E-09  |
| <i>Lsp1</i>          | 1.199125032 | 5.43558E-05 |
| <i>Pkdcc</i>         | 1.196854035 | 0.000153731 |
| <i>Lrrc29</i>        | 1.195152632 | 9.14962E-05 |
| <i>Agbl3</i>         | 1.193393243 | 1.14119E-09 |
| <i>Col8a1</i>        | 1.190208581 | 7.18382E-08 |
| <i>Icam5</i>         | 1.188538385 | 6.76581E-07 |
| <i>Ly75</i>          | 1.184912412 | 2.30916E-05 |
| <i>Tmem176a</i>      | 1.181593968 | 6.8321E-10  |
| <i>Fas</i>           | 1.177586048 | 0.001065651 |
| <i>Cyba</i>          | 1.175404835 | 0.000487845 |
| <i>Tmem151a</i>      | 1.174989274 | 9.02369E-07 |
| <i>Gjd3</i>          | 1.174814453 | 0.002533001 |
| <i>Tnfrsf18</i>      | 1.173972425 | 0.002649254 |
| <i>Lat</i>           | 1.169941928 | 0.006626504 |
| <i>Itgax</i>         | 1.162489042 | 0.000340789 |
| <i>Dnhd1</i>         | 1.154358672 | 0.000143204 |
| <i>Irf1</i>          | 1.152309193 | 1.33336E-06 |
| <i>Rbp2</i>          | 1.152174581 | 2.29358E-12 |
| <i>Wscd2</i>         | 1.152106466 | 0.000601576 |
| <i>Tubal3</i>        | 1.152102527 | 0.007562943 |
| <i>H2-Q4</i>         | 1.148702009 | 4.43852E-05 |
| <i>Krt222</i>        | 1.147184889 | 0.002381843 |
| <i>Anxa3</i>         | 1.14686161  | 3.09785E-06 |
| <i>Tmem80</i>        | 1.144960106 | 1.67381E-10 |
| <i>Lce6a</i>         | 1.142422658 | 5.39448E-09 |
| <i>Kif26b</i>        | 1.140830931 | 5.25865E-05 |
| <i>Selplg</i>        | 1.139932891 | 3.85628E-05 |
| <i>Cd53</i>          | 1.136208449 | 0.002822472 |



|                      |             |             |
|----------------------|-------------|-------------|
| <i>H2-T22</i>        | 1.132000219 | 6.15817E-09 |
| <i>Spn</i>           | 1.1251528   | 0.000638154 |
| <i>Lgals9</i>        | 1.12183177  | 6.86959E-09 |
| <i>Tgfbr3l</i>       | 1.120942178 | 0.00017857  |
| <i>Noxo1</i>         | 1.118016648 | 2.22977E-06 |
| <i>Tle6</i>          | 1.115395284 | 0.000448329 |
| <i>Lcp1</i>          | 1.114584033 | 6.20328E-05 |
| <i>Tnfrsf25</i>      | 1.114468972 | 0.000434425 |
| <i>Csf1</i>          | 1.113633752 | 0.000200065 |
| <i>Itgae</i>         | 1.109711816 | 0.003668098 |
| <i>Wfdc12</i>        | 1.109679881 | 0.000367873 |
| <i>Elk3</i>          | 1.103979318 | 2.84755E-06 |
| <i>Ybey</i>          | 1.099768919 | 4.20173E-10 |
| <i>Nckap1l</i>       | 1.09836085  | 0.000861462 |
| <i>Ggact</i>         | 1.095909674 | 0.000226443 |
| <i>Serpnb12</i>      | 1.095479028 | 3.29726E-06 |
| <i>Maneal</i>        | 1.094458253 | 0.00398627  |
| <i>Hmhal</i>         | 1.092803539 | 0.000263141 |
| <i>Pbx3</i>          | 1.088727098 | 2.89623E-08 |
| <i>Cxcl16</i>        | 1.083921222 | 7.89148E-10 |
| <i>Clec11a</i>       | 1.078521113 | 1.01325E-05 |
| <i>Gm5689</i>        | 1.077018704 | 4.8278E-13  |
| <i>Apobr</i>         | 1.076959809 | 4.87173E-05 |
| <i>9030617O03Rik</i> | 1.076862882 | 0.001796449 |
| <i>Casq2</i>         | 1.070288215 | 0.000536692 |
| <i>Zfp872</i>        | 1.067888917 | 0.009962039 |
| <i>Tmem173</i>       | 1.0677548   | 0.004052918 |
| <i>Knng2</i>         | 1.066030109 | 0.000594842 |
| <i>Atf3</i>          | 1.065355351 | 0.009821672 |
| <i>Pctp</i>          | 1.064584067 | 1.11183E-09 |
| <i>Morn2</i>         | 1.064103185 | 8.44486E-05 |
| <i>Tspan4</i>        | 1.061875191 | 0.00031329  |
| <i>Tap2</i>          | 1.061812691 | 5.34864E-10 |
| <i>Cep135</i>        | 1.061449275 | 0.000408513 |
| <i>Flywch2</i>       | 1.058722018 | 6.52811E-05 |
| <i>Aoc2</i>          | 1.058253602 | 9.75131E-08 |
| <i>Fam162a</i>       | 1.049821318 | 1.05134E-12 |
| <i>Ina</i>           | 1.047481216 | 0.004000379 |
| <i>Gpm6b</i>         | 1.046979905 | 0.005218922 |
| <i>3110062M04Rik</i> | 1.046039527 | 2.27416E-07 |
| <i>Mkl</i>           | 1.045480417 | 4.57792E-05 |
| <i>Upk1a</i>         | 1.04403007  | 0.003825764 |
| <i>H2-Eb1</i>        | 1.042248308 | 8.26218E-07 |
| <i>Itpka</i>         | 1.040967333 | 0.004343132 |

|                 |              |             |
|-----------------|--------------|-------------|
| <i>Pglyrp3</i>  | 1.040281782  | 0.000108119 |
| <i>Jak3</i>     | 1.039237981  | 0.000487845 |
| <i>Sh2d5</i>    | 1.036310468  | 0.002288553 |
| <i>Rbp7</i>     | 1.031347501  | 1.23595E-07 |
| <i>Il1f5</i>    | 1.031253951  | 1.08214E-07 |
| <i>Ldhb</i>     | 1.031211386  | 1.21378E-09 |
| <i>Icam1</i>    | 1.030354606  | 2.55228E-07 |
| <i>Bfsp1</i>    | 1.030188656  | 3.40426E-06 |
| <i>Clqtnf6</i>  | 1.029514441  | 0.004174722 |
| <i>Cyp3a13</i>  | 1.028162535  | 4.34199E-07 |
| <i>Serpib9</i>  | 1.027089861  | 0.008812934 |
| <i>Arhgap30</i> | 1.025207634  | 9.08558E-06 |
| <i>Ppp1r14a</i> | 1.02351259   | 0.005156381 |
| <i>Zbtb48</i>   | 1.022350347  | 1.11701E-10 |
| <i>Neur11b</i>  | 1.0194539    | 1.80078E-06 |
| <i>Col5a3</i>   | 1.017807047  | 0.008812934 |
| <i>Flg</i>      | 1.017633188  | 0.00035916  |
| <i>Acot5</i>    | 1.017221714  | 1.35944E-05 |
| <i>Azin2</i>    | 1.017003666  | 1.13486E-09 |
| <i>Tdrp</i>     | 1.015613162  | 0.000644766 |
| <i>Acox1</i>    | 1.014305397  | 1.5101E-07  |
| <i>Tcaf2</i>    | 1.012324303  | 3.09135E-07 |
| <i>Nsun5</i>    | 1.010925087  | 2.2682E-12  |
| <i>Angptl4</i>  | 1.010625871  | 0.000331721 |
| <i>Apoc1</i>    | 1.007769351  | 6.86959E-09 |
| <i>Il33</i>     | 1.004278997  | 0.000204035 |
| <i>Fhl3</i>     | 1.003737961  | 1.21185E-05 |
| <i>Ccl22</i>    | 1.001835942  | 4.66887E-06 |
| <i>Iqgap2</i>   | -1.004060618 | 0.005897679 |
| <i>Lap3</i>     | -1.005748064 | 8.85028E-08 |
| <i>Parp1</i>    | -1.007267422 | 2.09971E-11 |
| <i>Rnaset2a</i> | -1.010531743 | 0.000507785 |
| <i>Vtcn1</i>    | -1.010764613 | 0.003723577 |
| <i>Gmpr</i>     | -1.011791608 | 0.009497407 |
| <i>Foxn1</i>    | -1.012345637 | 5.77868E-08 |
| <i>Sp6</i>      | -1.013668816 | 5.39448E-09 |
| <i>Dmpk</i>     | -1.014517811 | 5.69197E-08 |
| <i>Isoc2a</i>   | -1.017781609 | 3.88153E-06 |
| <i>Fstl1</i>    | -1.017867526 | 1.2988E-07  |
| <i>Rgl1</i>     | -1.02181208  | 3.62964E-05 |
| <i>Lym9</i>     | -1.021987568 | 8.73857E-06 |
| <i>Zdhhc15</i>  | -1.022326374 | 0.000157543 |
| <i>Mroh1</i>    | -1.024312927 | 5.59065E-10 |
| <i>Zfp786</i>   | -1.024927449 | 0.006934553 |

|                      |              |             |
|----------------------|--------------|-------------|
| <i>Ache</i>          | -1.026742114 | 9.76463E-06 |
| <i>Mical1</i>        | -1.027484337 | 3.48986E-11 |
| <i>Morn4</i>         | -1.027702553 | 0.001117848 |
| <i>Prickle1</i>      | -1.030264731 | 6.29E-07    |
| <i>Whrn</i>          | -1.032762693 | 2.07863E-06 |
| <i>Ngfr</i>          | -1.034502338 | 0.000751925 |
| <i>Tbc1d16</i>       | -1.037722838 | 9.50023E-08 |
| <i>Slc16a5</i>       | -1.038600973 | 0.00013107  |
| <i>Paqr8</i>         | -1.040364822 | 0.003202655 |
| <i>Tmem117</i>       | -1.041850602 | 1.90635E-05 |
| <i>Adamts9</i>       | -1.042237035 | 0.001077273 |
| <i>Zdhhc12</i>       | -1.042948063 | 0.001002224 |
| <i>Tspan13</i>       | -1.043015892 | 0.008573087 |
| <i>Dlx3</i>          | -1.047392892 | 2.13605E-06 |
| <i>Slc9a3r2</i>      | -1.047738199 | 0.008834333 |
| <i>Gm973</i>         | -1.050402199 | 4.29689E-05 |
| <i>Bmper</i>         | -1.051225039 | 0.002659409 |
| <i>Prkcq</i>         | -1.054019871 | 0.000374943 |
| <i>Skint10</i>       | -1.056902972 | 7.90313E-09 |
| <i>Papln</i>         | -1.058177477 | 0.000167712 |
| <i>Dapk1</i>         | -1.059848968 | 3.43148E-07 |
| <i>Npas2</i>         | -1.061383182 | 0.000119311 |
| <i>5330417C22Rik</i> | -1.065529443 | 0.005733133 |
| <i>Foxq1</i>         | -1.066666888 | 3.18318E-10 |
| <i>Car6</i>          | -1.06750232  | 0.000274452 |
| <i>Gna14</i>         | -1.068097494 | 1.63321E-05 |
| <i>E2f7</i>          | -1.069761038 | 0.000136897 |
| <i>Pitpnc1</i>       | -1.074713002 | 7.55963E-08 |
| <i>Lgals3bp</i>      | -1.084948558 | 0.000136897 |
| <i>Rab44</i>         | -1.086003205 | 0.001922212 |
| <i>Otop2</i>         | -1.093862057 | 0.002129197 |
| <i>Kcng4</i>         | -1.095442812 | 0.002399151 |
| <i>Ccdc171</i>       | -1.100997152 | 0.001685961 |
| <i>Tmem45a2</i>      | -1.102796862 | 7.54719E-06 |
| <i>Cecr2</i>         | -1.105080225 | 8.34106E-05 |
| <i>Sptb</i>          | -1.109889144 | 0.003104057 |
| <i>Ptpru</i>         | -1.110851465 | 1.21424E-05 |
| <i>Cadm4</i>         | -1.110906206 | 3.02598E-05 |
| <i>C130074G19Rik</i> | -1.113017456 | 0.007584093 |
| <i>Slc43a1</i>       | -1.113809261 | 1.01274E-06 |
| <i>Fn1</i>           | -1.115696191 | 7.65871E-06 |
| <i>Tet1</i>          | -1.11677107  | 0.004785037 |
| <i>Sema7a</i>        | -1.120747673 | 1.57182E-07 |
| <i>Kcnn1</i>         | -1.125586145 | 0.001470661 |

|                 |              |             |
|-----------------|--------------|-------------|
| <i>Rbms3</i>    | -1.137925579 | 0.000156467 |
| <i>Cntfr</i>    | -1.141216183 | 0.000144901 |
| <i>Cdc42ep2</i> | -1.141281203 | 0.002659263 |
| <i>Cpxm1</i>    | -1.141510509 | 0.000167937 |
| <i>Slc6a4</i>   | -1.142958641 | 4.37242E-12 |
| <i>Grik5</i>    | -1.145901676 | 0.000145842 |
| <i>Cyp2f2</i>   | -1.146137445 | 0.004119352 |
| <i>Rnf128</i>   | -1.147628494 | 0.000237162 |
| <i>Man1c1</i>   | -1.150844194 | 7.74898E-05 |
| <i>Bmp4</i>     | -1.156001429 | 7.03476E-05 |
| <i>Tnfrsf22</i> | -1.157687569 | 0.000752728 |
| <i>Selenbp1</i> | -1.159781968 | 3.16434E-12 |
| <i>Dlx1</i>     | -1.159928056 | 2.7261E-05  |
| <i>Tnik</i>     | -1.165670792 | 5.28645E-05 |
| <i>Tmod2</i>    | -1.165974309 | 0.007701554 |
| <i>Srl</i>      | -1.166566047 | 2.74923E-07 |
| <i>Hoxc13</i>   | -1.167893215 | 4.45346E-09 |
| <i>Grem1</i>    | -1.168917857 | 0.002198622 |
| <i>Rasl1b</i>   | -1.171176609 | 0.001298316 |
| <i>Ggt1</i>     | -1.171327471 | 0.005978384 |
| <i>Rhpn2</i>    | -1.175231992 | 4.83181E-05 |
| <i>Nrcam</i>    | -1.17631259  | 0.000269588 |
| <i>Sox6</i>     | -1.179194372 | 7.08337E-08 |
| <i>Pls1</i>     | -1.180880281 | 0.003745835 |
| <i>Phactr1</i>  | -1.181982229 | 0.000639776 |
| <i>Rerg</i>     | -1.183179735 | 3.99699E-07 |
| <i>Frem2</i>    | -1.18810264  | 0.000273765 |
| <i>Adap1</i>    | -1.189322063 | 2.01986E-05 |
| <i>Ctps</i>     | -1.197481746 | 2.69883E-15 |
| <i>Susd4</i>    | -1.20394234  | 3.88571E-10 |
| <i>Slc30a2</i>  | -1.204099337 | 0.007381624 |
| <i>Serpib7</i>  | -1.204875062 | 1.60632E-15 |
| <i>Acot12</i>   | -1.207073048 | 0.003269479 |
| <i>Fam20a</i>   | -1.211117792 | 7.80325E-08 |
| <i>Lmod2</i>    | -1.215371078 | 0.001376363 |
| <i>Osbpl10</i>  | -1.216519316 | 7.01462E-07 |
| <i>Krtap3-1</i> | -1.217224229 | 0.000503954 |
| <i>Dcp1b</i>    | -1.21826797  | 2.01729E-11 |
| <i>Fxyd4</i>    | -1.219256014 | 0.000597777 |
| <i>Htr1d</i>    | -1.21955686  | 5.48495E-07 |
| <i>Fhod3</i>    | -1.221017983 | 3.63604E-06 |
| <i>Vcan</i>     | -1.222285989 | 9.78274E-06 |
| <i>Rnf180</i>   | -1.227192731 | 0.000566501 |
| <i>Ikzf4</i>    | -1.227848918 | 1.2318E-07  |

|                      |              |             |
|----------------------|--------------|-------------|
| <i>Efemp1</i>        | -1.228579612 | 1.67381E-10 |
| <i>Zfp937</i>        | -1.228896517 | 0.003510394 |
| <i>Tbc1d30</i>       | -1.233564609 | 3.3989E-10  |
| <i>Eid2</i>          | -1.239503504 | 0.003967921 |
| <i>Ahnak2</i>        | -1.246124702 | 1.78972E-11 |
| <i>Prom1</i>         | -1.249579058 | 0.00690114  |
| <i>A530016L24Rik</i> | -1.251391758 | 0.003546523 |
| <i>Cpm</i>           | -1.251830564 | 4.68948E-05 |
| <i>Coll4a1</i>       | -1.25435714  | 6.46595E-06 |
| <i>Cfap70</i>        | -1.256422368 | 0.008473109 |
| <i>Arid3a</i>        | -1.257186427 | 1.72017E-11 |
| <i>Zfp612</i>        | -1.257439267 | 0.000155141 |
| <i>Dclk2</i>         | -1.267904706 | 1.27706E-05 |
| <i>P2ry2</i>         | -1.268512874 | 7.36174E-08 |
| <i>Ccl28</i>         | -1.273220812 | 8.87025E-06 |
| <i>Dennd2a</i>       | -1.275290717 | 0.007416388 |
| <i>Serpinb6d</i>     | -1.276831852 | 1.1035E-05  |
| <i>Lgals7</i>        | -1.286379781 | 5.53721E-05 |
| <i>Il20ra</i>        | -1.288294013 | 0.004822713 |
| <i>Trim15</i>        | -1.28862445  | 0.001979653 |
| <i>Glde</i>          | -1.289697937 | 0.000151242 |
| <i>D6Ert527e</i>     | -1.297515511 | 0.002793491 |
| <i>Capn12</i>        | -1.297978716 | 3.78151E-12 |
| <i>Tspan7</i>        | -1.298739905 | 1.65753E-14 |
| <i>Cdkn1c</i>        | -1.306040553 | 0.004962898 |
| <i>Eln</i>           | -1.308012012 | 0.00056953  |
| <i>Zfp608</i>        | -1.316022735 | 2.74671E-07 |
| <i>Cyp2b23</i>       | -1.316932038 | 6.53537E-06 |
| <i>Ica11</i>         | -1.320641656 | 0.000970042 |
| <i>Aldh3b3</i>       | -1.325540724 | 7.10532E-16 |
| <i>Clec2e</i>        | -1.329606349 | 0.000119398 |
| <i>Ptger3</i>        | -1.331859146 | 0.000145842 |
| <i>Smad9</i>         | -1.333999258 | 0.000476068 |
| <i>F3</i>            | -1.335917542 | 2.28164E-18 |
| <i>Acvr2b</i>        | -1.34021805  | 0.009751475 |
| <i>Lonrf3</i>        | -1.340231513 | 0.000200543 |
| <i>Zfhx2</i>         | -1.344243102 | 1.48525E-07 |
| <i>Prss53</i>        | -1.345172883 | 1.47884E-06 |
| <i>Ephb1</i>         | -1.345770007 | 0.0006656   |
| <i>Pdia5</i>         | -1.351434904 | 0.000636776 |
| <i>Rpp25</i>         | -1.353788661 | 0.000761341 |
| <i>Fmo1</i>          | -1.360063269 | 5.99145E-05 |
| <i>Chd5</i>          | -1.360843632 | 0.007100269 |
| <i>Svip</i>          | -1.368117026 | 2.64015E-08 |

|                      |              |             |
|----------------------|--------------|-------------|
| <i>Cygb</i>          | -1.369908462 | 8.55287E-05 |
| <i>Mgat5b</i>        | -1.374495781 | 3.95173E-06 |
| <i>Lrat</i>          | -1.376488908 | 0.000979439 |
| <i>Cilp</i>          | -1.37876731  | 0.005357691 |
| <i>Mfsd4</i>         | -1.388034902 | 3.70109E-10 |
| <i>Sod3</i>          | -1.3901562   | 0.005111228 |
| <i>Pde1c</i>         | -1.398472994 | 0.000148662 |
| <i>Sulf1</i>         | -1.407431916 | 0.003141655 |
| <i>Lmtk3</i>         | -1.411268838 | 0.000244474 |
| <i>D730001G18Rik</i> | -1.411619181 | 0.000818573 |
| <i>Psors1c2</i>      | -1.412281331 | 9.13045E-10 |
| <i>Ccdc69</i>        | -1.413242859 | 0.003910513 |
| <i>Gm13177</i>       | -1.416402175 | 7.27973E-11 |
| <i>Entpd3</i>        | -1.42432949  | 1.05853E-06 |
| <i>Tacr3</i>         | -1.430759684 | 0.000236258 |
| <i>Palm3</i>         | -1.432162325 | 2.59466E-06 |
| <i>Igfbp5</i>        | -1.440220178 | 9.84189E-06 |
| <i>Foxc2</i>         | -1.443502975 | 1.1035E-05  |
| <i>Hmgn2</i>         | -1.446368327 | 0.00640313  |
| <i>Tnfrsf13c</i>     | -1.45200694  | 4.83181E-05 |
| <i>Cd19</i>          | -1.458543859 | 0.002601025 |
| <i>Rasd2</i>         | -1.460183252 | 0.000152995 |
| <i>Cybrd1</i>        | -1.46350546  | 3.00325E-08 |
| <i>Nup210</i>        | -1.473790262 | 1.4021E-09  |
| <i>Dlx4</i>          | -1.475420392 | 3.47776E-09 |
| <i>Gm11569</i>       | -1.486852988 | 0.005865179 |
| <i>Cacna1d</i>       | -1.486882236 | 7.98147E-05 |
| <i>Ccdc109b</i>      | -1.493573758 | 3.0162E-06  |
| <i>Nmnat2</i>        | -1.495509865 | 0.000483754 |
| <i>Slc4a9</i>        | -1.510390596 | 5.62747E-08 |
| <i>Tll1</i>          | -1.513240696 | 0.000752587 |
| <i>Hpgd</i>          | -1.517110808 | 6.62252E-23 |
| <i>Trpm6</i>         | -1.518664171 | 0.000730397 |
| <i>Lrrc31</i>        | -1.519827096 | 0.000296831 |
| <i>Cysltr1</i>       | -1.520042339 | 0.001324746 |
| <i>Krt32</i>         | -1.521351633 | 0.002693656 |
| <i>Nkd1</i>          | -1.521447317 | 7.48229E-09 |
| <i>Lppr3</i>         | -1.524055367 | 1.22967E-09 |
| <i>Igfbp3</i>        | -1.524854196 | 5.62097E-05 |
| <i>Rab37</i>         | -1.527502746 | 0.001321488 |
| <i>Kcne1</i>         | -1.528114151 | 0.008993478 |
| <i>Sstr2</i>         | -1.530415749 | 0.002692875 |
| <i>Mex3a</i>         | -1.533068876 | 7.99085E-15 |
| <i>Plce1</i>         | -1.535365014 | 0.002630921 |

|                 |              |             |
|-----------------|--------------|-------------|
| <i>Cdh4</i>     | -1.538582835 | 1.4661E-05  |
| <i>Pde9a</i>    | -1.538920623 | 0.000647817 |
| <i>Gjal</i>     | -1.54177872  | 6.96801E-10 |
| <i>Coro6</i>    | -1.550953097 | 0.00438051  |
| <i>Fras1</i>    | -1.55485205  | 8.11599E-05 |
| <i>Slc5a5</i>   | -1.5570641   | 0.000290651 |
| <i>Selenbp2</i> | -1.557330487 | 9.82796E-20 |
| <i>Gpr176</i>   | -1.557538995 | 0.000182769 |
| <i>Gatm</i>     | -1.562184606 | 2.49303E-06 |
| <i>Kcng2</i>    | -1.567500991 | 0.001566227 |
| <i>Ifi205</i>   | -1.568025485 | 0.001438505 |
| <i>Mest</i>     | -1.57108776  | 1.17898E-05 |
| <i>Cldn8</i>    | -1.571891363 | 4.74167E-12 |
| <i>Tsppear</i>  | -1.579852227 | 0.000309069 |
| <i>Mtcl1</i>    | -1.586258209 | 6.28913E-11 |
| <i>Ebf4</i>     | -1.58816803  | 0.001139128 |
| <i>Krtap3-3</i> | -1.588324369 | 0.000148329 |
| <i>Bambi</i>    | -1.590090658 | 1.85066E-10 |
| <i>Nim1k</i>    | -1.598537043 | 1.11383E-05 |
| <i>Pvrl3</i>    | -1.600752699 | 0.000133938 |
| <i>Elf5</i>     | -1.60187165  | 5.01557E-09 |
| <i>Cystm1</i>   | -1.602810345 | 2.0344E-09  |
| <i>Adamts14</i> | -1.604745681 | 2.5401E-15  |
| <i>Srms</i>     | -1.613312405 | 2.1157E-07  |
| <i>Ldoc1l</i>   | -1.620784883 | 6.00469E-06 |
| <i>Snhg1l</i>   | -1.622432128 | 3.40226E-08 |
| <i>Ccr4</i>     | -1.62716433  | 7.57885E-05 |
| <i>Hecw2</i>    | -1.631533382 | 7.71759E-05 |
| <i>Krt73</i>    | -1.632066943 | 0.00250614  |
| <i>Hspa12a</i>  | -1.633361509 | 3.26361E-19 |
| <i>Spock2</i>   | -1.637455199 | 6.9067E-28  |
| <i>Fam228b</i>  | -1.637735442 | 0.000741722 |
| <i>Xpnpep2</i>  | -1.637800707 | 6.37555E-06 |
| <i>Slc18a1</i>  | -1.637985633 | 0.000348099 |
| <i>Smc1b</i>    | -1.642184402 | 0.004502668 |
| <i>Gpr156</i>   | -1.648313735 | 1.70531E-05 |
| <i>Msx1</i>     | -1.648907036 | 5.07508E-05 |
| <i>Krt28</i>    | -1.651752676 | 0.001385896 |
| <i>Tmem28</i>   | -1.652916397 | 7.54241E-07 |
| <i>Golga7b</i>  | -1.658301288 | 8.77596E-06 |
| <i>Slc38a3</i>  | -1.658751366 | 7.08425E-07 |
| <i>Ceacam1</i>  | -1.661351594 | 0.003847129 |
| <i>Muc3a</i>    | -1.666817043 | 5.75245E-05 |
| <i>Rassf2</i>   | -1.680382382 | 1.90635E-05 |

|                  |              |             |
|------------------|--------------|-------------|
| <i>Ccdc149</i>   | -1.684245748 | 2.19212E-05 |
| <i>Gnmt</i>      | -1.685263422 | 0.000455343 |
| <i>Igf2</i>      | -1.689140615 | 0.000142777 |
| <i>Slc4a1</i>    | -1.689351182 | 0.00079114  |
| <i>Tchh</i>      | -1.698076959 | 0.000969344 |
| <i>Bean1</i>     | -1.698792328 | 0.000587802 |
| <i>Gabrp</i>     | -1.706250344 | 0.000424397 |
| <i>Fgd5</i>      | -1.707700753 | 0.005471903 |
| <i>Ccdc158</i>   | -1.713530059 | 0.000671563 |
| <i>Cxxc4</i>     | -1.718619132 | 0.000132519 |
| <i>Ugt2b1</i>    | -1.72531576  | 0.005944941 |
| <i>Fam49a</i>    | -1.73516181  | 7.9917E-07  |
| <i>Krt71</i>     | -1.740036414 | 0.002466243 |
| <i>Xkr6</i>      | -1.743145304 | 1.45002E-09 |
| <i>Dclk3</i>     | -1.74438736  | 0.000144549 |
| <i>Zfp941</i>    | -1.744776486 | 0.000707279 |
| <i>Fndc4</i>     | -1.747045457 | 4.50096E-07 |
| <i>Cldn10</i>    | -1.751819926 | 6.27798E-06 |
| <i>Ablim2</i>    | -1.75743324  | 5.78836E-05 |
| <i>Steap1</i>    | -1.760316056 | 7.55609E-06 |
| <i>Slc39a8</i>   | -1.772190206 | 0.000357038 |
| <i>Gpm6a</i>     | -1.783744612 | 5.32781E-14 |
| <i>Mpo</i>       | -1.786283145 | 0.002815094 |
| <i>Kcp</i>       | -1.791798205 | 0.00261773  |
| <i>Pm20d1</i>    | -1.792782934 | 4.29066E-32 |
| <i>Upp1</i>      | -1.794079184 | 0.000411853 |
| <i>Mlf1</i>      | -1.798030263 | 3.22543E-14 |
| <i>Eml1</i>      | -1.799087089 | 7.228E-16   |
| <i>Cryba4</i>    | -1.799203605 | 0.001570645 |
| <i>Gm7735</i>    | -1.803622532 | 7.60444E-06 |
| <i>Myb</i>       | -1.803923925 | 1.81192E-07 |
| <i>Chac1</i>     | -1.807587136 | 7.40378E-16 |
| <i>Heyl</i>      | -1.811321626 | 0.002983543 |
| <i>Gja3</i>      | -1.82001441  | 6.45954E-08 |
| <i>Fap</i>       | -1.826744309 | 0.000466863 |
| <i>Fam124b</i>   | -1.82786417  | 4.3521E-07  |
| <i>Oprd1</i>     | -1.829627351 | 0.000843694 |
| <i>En1</i>       | -1.831600624 | 0.000513164 |
| <i>Scn4b</i>     | -1.832181743 | 2.1662E-05  |
| <i>Krtap27-1</i> | -1.837078961 | 5.62097E-05 |
| <i>Bend5</i>     | -1.837536604 | 7.39518E-10 |
| <i>Krtap6-2</i>  | -1.847137771 | 1.72425E-08 |
| <i>Nxf7</i>      | -1.863366871 | 0.000181181 |
| <i>Olfml2b</i>   | -1.870643331 | 7.29165E-05 |



|                      |              |             |
|----------------------|--------------|-------------|
| <i>Mal</i>           | -1.870969017 | 8.00963E-06 |
| <i>Gm11554</i>       | -1.873472031 | 9.66221E-05 |
| <i>Reep1</i>         | -1.874819019 | 1.96046E-09 |
| <i>Gng4</i>          | -1.875233941 | 1.23186E-07 |
| <i>Eci3</i>          | -1.878727648 | 0.004699534 |
| <i>Ccnjl</i>         | -1.884392048 | 0.002805295 |
| <i>Scara5</i>        | -1.889100139 | 0.002568308 |
| <i>Gpr50</i>         | -1.890283864 | 2.20156E-05 |
| <i>Akap12</i>        | -1.890442472 | 7.39587E-07 |
| <i>Prrt1</i>         | -1.892076949 | 9.07556E-06 |
| <i>Nsg1</i>          | -1.892202444 | 1.72017E-11 |
| <i>Lef1</i>          | -1.893027933 | 4.38852E-09 |
| <i>Slc35f1</i>       | -1.893135932 | 5.43272E-07 |
| <i>Ly6g6d</i>        | -1.899686778 | 0.000128716 |
| <i>Msx2</i>          | -1.903144918 | 6.28913E-11 |
| <i>Myef2</i>         | -1.913418783 | 8.26722E-11 |
| <i>Krtap20-2</i>     | -1.914210347 | 6.96535E-12 |
| <i>Gm11564</i>       | -1.915940802 | 0.000781316 |
| <i>Mettl7a3</i>      | -1.922357452 | 1.97263E-06 |
| <i>Gfra3</i>         | -1.922536107 | 5.4051E-07  |
| <i>Krt27</i>         | -1.932209761 | 0.001183934 |
| <i>Nrxn2</i>         | -1.936190215 | 1.97531E-07 |
| <i>Krtap3-2</i>      | -1.943491018 | 3.80019E-10 |
| <i>Gfra2</i>         | -1.945310721 | 0.000208649 |
| <i>Dysf</i>          | -1.952866494 | 2.46299E-08 |
| <i>St8sia6</i>       | -1.958887778 | 1.42421E-05 |
| <i>Dnajc6</i>        | -1.960123395 | 4.65883E-09 |
| <i>Procr</i>         | -1.967369513 | 1.01274E-06 |
| <i>B4galnt4</i>      | -1.974211793 | 7.36536E-11 |
| <i>Adrb1</i>         | -1.978425781 | 2.18331E-07 |
| <i>Rgs6</i>          | -1.982074848 | 0.000752728 |
| <i>2310079G19Rik</i> | -1.993246612 | 0.001544723 |
| <i>Gm438</i>         | -2.002058479 | 1.68475E-22 |
| <i>Krt39</i>         | -2.005277415 | 2.47386E-06 |
| <i>Atp8b5</i>        | -2.016909843 | 0.001124375 |
| <i>Ccdc155</i>       | -2.022692603 | 3.99699E-07 |
| <i>S100a3</i>        | -2.030793533 | 0.000107123 |
| <i>Fbp1</i>          | -2.03307297  | 0.000375002 |
| <i>Cldn14</i>        | -2.034918745 | 0.000407135 |
| <i>Gm9833</i>        | -2.035634706 | 2.11812E-06 |
| <i>Galnt9</i>        | -2.044729375 | 5.50884E-06 |
| <i>Gpc3</i>          | -2.045372652 | 3.15545E-18 |
| <i>Serpina1e</i>     | -2.062081639 | 0.000739572 |
| <i>Dusp2</i>         | -2.063991397 | 2.79614E-07 |

|                  |              |             |
|------------------|--------------|-------------|
| <i>Stox1</i>     | -2.07441413  | 7.50024E-05 |
| <i>Il1f10</i>    | -2.081587466 | 3.55642E-08 |
| <i>Gprc5a</i>    | -2.082290598 | 5.18776E-05 |
| <i>Bhlha9</i>    | -2.090391028 | 0.000688413 |
| <i>Efhd1</i>     | -2.095352116 | 9.61603E-11 |
| <i>Zfp618</i>    | -2.099872091 | 2.45477E-39 |
| <i>Ctse</i>      | -2.102691496 | 9.73026E-05 |
| <i>Fam169a</i>   | -2.118579894 | 0.000682774 |
| <i>Nkd2</i>      | -2.128456488 | 3.26968E-07 |
| <i>Prdm8</i>     | -2.131090129 | 0.001838085 |
| <i>Pcp4</i>      | -2.134890436 | 8.30587E-07 |
| <i>Myo5c</i>     | -2.143510814 | 6.1443E-09  |
| <i>Slc9a2</i>    | -2.149807462 | 4.57792E-05 |
| <i>Tigd4</i>     | -2.151579783 | 6.5039E-08  |
| <i>Gm10228</i>   | -2.172046743 | 1.0121E-09  |
| <i>Krt82</i>     | -2.182144456 | 0.00363494  |
| <i>Rnf182</i>    | -2.193947642 | 2.98102E-06 |
| <i>Dsg4</i>      | -2.196393593 | 0.000156479 |
| <i>Krtap6-1</i>  | -2.219588854 | 5.02769E-07 |
| <i>Skint11</i>   | -2.227419012 | 2.04669E-10 |
| <i>Lrrc15</i>    | -2.238065612 | 1.92437E-10 |
| <i>Krtap16-1</i> | -2.238163589 | 0.001130784 |
| <i>Krtap9-5</i>  | -2.239650443 | 3.16972E-06 |
| <i>Krtap24-1</i> | -2.239869449 | 0.002094061 |
| <i>Padi1</i>     | -2.24143625  | 2.3848E-06  |
| <i>Prr9</i>      | -2.248166713 | 2.04709E-11 |
| <i>Npy1r</i>     | -2.262725708 | 1.98863E-06 |
| <i>Krt74</i>     | -2.275954929 | 5.55206E-07 |
| <i>Padi3</i>     | -2.280068506 | 0.000244363 |
| <i>Krtap21-1</i> | -2.283547921 | 3.51027E-10 |
| <i>Csdc2</i>     | -2.295905398 | 3.60766E-09 |
| <i>S100a7a</i>   | -2.296041996 | 1.39135E-08 |
| <i>Rgs16</i>     | -2.296596239 | 2.1383E-05  |
| <i>Krt40</i>     | -2.321606551 | 0.000600181 |
| <i>Krtap17-1</i> | -2.321898671 | 1.27436E-06 |
| <i>Pkdrej</i>    | -2.323794459 | 0.000107979 |
| <i>Rtkn2</i>     | -2.346184154 | 1.2987E-08  |
| <i>Sptssb</i>    | -2.35403826  | 7.1994E-07  |
| <i>Krtap13-1</i> | -2.369384887 | 2.46055E-07 |
| <i>Syt7</i>      | -2.382621131 | 6.68065E-09 |
| <i>Tesc</i>      | -2.384053329 | 2.87323E-15 |
| <i>Il22ra2</i>   | -2.384254895 | 4.82479E-09 |
| <i>Capn8</i>     | -2.384773319 | 2.89226E-07 |
| <i>Bmp8a</i>     | -2.386111335 | 9.75131E-08 |

|                      |              |             |
|----------------------|--------------|-------------|
| <i>Scgb1a1</i>       | -2.389153574 | 2.16994E-18 |
| <i>Krtap6-5</i>      | -2.390259491 | 1.40149E-09 |
| <i>Bex1</i>          | -2.397355538 | 1.04619E-05 |
| <i>Chrna4</i>        | -2.411209551 | 0.000834734 |
| <i>Crnn</i>          | -2.415867222 | 2.97211E-08 |
| <i>Zpbp</i>          | -2.436588443 | 1.90635E-05 |
| <i>Krt25</i>         | -2.439247604 | 0.000820776 |
| <i>Vsig8</i>         | -2.445733594 | 0.000370171 |
| <i>Krt26</i>         | -2.454577579 | 0.000414244 |
| <i>1110025L11Rik</i> | -2.470151097 | 1.3995E-07  |
| <i>Itga11</i>        | -2.477444422 | 1.42646E-05 |
| <i>Grm4</i>          | -2.481652115 | 2.10802E-10 |
| <i>Gm3250</i>        | -2.488278754 | 1.11416E-08 |
| <i>Krtap22-2</i>     | -2.489617149 | 2.1348E-10  |
| <i>Krt72</i>         | -2.489701735 | 0.000148852 |
| <i>Krtap26-1</i>     | -2.492125566 | 3.34894E-06 |
| <i>Krtap10-4</i>     | -2.502256535 | 0.000246438 |
| <i>Lyg2</i>          | -2.50701389  | 0.000933096 |
| <i>Foxl1</i>         | -2.514146811 | 0.001545073 |
| <i>Tmprss11c</i>     | -2.519929246 | 0.00043496  |
| <i>Klk15</i>         | -2.52368422  | 6.87658E-08 |
| <i>Sez6</i>          | -2.531976297 | 0.002767117 |
| <i>Gm3233</i>        | -2.534882924 | 9.14251E-06 |
| <i>Crym</i>          | -2.552400659 | 4.79172E-06 |
| <i>Gm7138</i>        | -2.555380012 | 1.85066E-10 |
| <i>Krt31</i>         | -2.575171731 | 6.37958E-05 |
| <i>Krtap4-16</i>     | -2.581645002 | 2.25559E-05 |
| <i>Gm3238</i>        | -2.587727845 | 6.43614E-05 |
| <i>Actbl2</i>        | -2.594303484 | 2.34394E-05 |
| <i>Slco4c1</i>       | -2.597861113 | 4.97553E-05 |
| <i>Krt34</i>         | -2.599388566 | 9.78274E-06 |
| <i>Kcnk16</i>        | -2.636296702 | 8.8273E-05  |
| <i>Gm11562</i>       | -2.641350221 | 2.84632E-09 |
| <i>Pla2g4c</i>       | -2.646173198 | 9.03207E-15 |
| <i>Fam26d</i>        | -2.647676767 | 0.000209221 |
| <i>5430421N21Rik</i> | -2.648366982 | 6.43301E-06 |
| <i>Krt83</i>         | -2.650453549 | 1.43813E-06 |
| <i>Gm10272</i>       | -2.654932496 | 7.60444E-06 |
| <i>Krt86</i>         | -2.671458891 | 1.06086E-05 |
| <i>Fabp4</i>         | -2.693339413 | 1.49004E-12 |
| <i>Slc13a2</i>       | -2.693614521 | 0.006699166 |
| <i>Gm10229</i>       | -2.695501376 | 1.38824E-09 |
| <i>Csmd2</i>         | -2.704266096 | 0.000130488 |
| <i>Grik4</i>         | -2.704428864 | 1.36979E-19 |

|                  |              |             |
|------------------|--------------|-------------|
| <i>Gm10142</i>   | -2.707049729 | 1.79872E-06 |
| <i>Krtap11-1</i> | -2.710909734 | 1.72766E-05 |
| <i>Rgs7bp</i>    | -2.723712428 | 1.97531E-07 |
| <i>Car8</i>      | -2.727010765 | 1.42708E-05 |
| <i>Gm11938</i>   | -2.745562606 | 6.11973E-08 |
| <i>Krtap4-8</i>  | -2.747906331 | 1.5101E-07  |
| <i>Krtap4-9</i>  | -2.748577738 | 4.59821E-07 |
| <i>Krtap19-5</i> | -2.75142545  | 1.51539E-08 |
| <i>Gm11937</i>   | -2.754419141 | 1.2183E-07  |
| <i>Cpxm2</i>     | -2.764628007 | 4.65735E-50 |
| <i>Krtap12-1</i> | -2.77128549  | 1.1035E-05  |
| <i>Krt81</i>     | -2.774425057 | 4.12154E-06 |
| <i>Gm266</i>     | -2.776176381 | 2.54558E-10 |
| <i>Dio3</i>      | -2.77941411  | 1.34521E-11 |
| <i>Adamts19</i>  | -2.784471759 | 2.63997E-05 |
| <i>Pax7</i>      | -2.788219434 | 4.83181E-05 |
| <i>Krtap2-4</i>  | -2.788916728 | 5.77165E-08 |
| <i>Gm19402</i>   | -2.791499326 | 6.8247E-06  |
| <i>Gm11939</i>   | -2.798583318 | 9.91565E-19 |
| <i>Tagln3</i>    | -2.799229629 | 4.87383E-08 |
| <i>Gm9507</i>    | -2.80438723  | 8.87864E-05 |
| <i>Krt33b</i>    | -2.809277596 | 8.9707E-06  |
| <i>Gm10024</i>   | -2.825292875 | 7.08568E-05 |
| <i>Gm11595</i>   | -2.854793187 | 6.63124E-08 |
| <i>Gm11596</i>   | -2.857677717 | 4.33668E-08 |
| <i>Gm19668</i>   | -2.858712033 | 1.50898E-06 |
| <i>Gprc5d</i>    | -2.871884753 | 7.1994E-07  |
| <i>Krtap4-2</i>  | -2.876686498 | 3.17171E-08 |
| <i>Krtap1-3</i>  | -2.879373593 | 5.7069E-07  |
| <i>Syt17</i>     | -2.890451029 | 6.51568E-10 |
| <i>Krtap29-1</i> | -2.895859207 | 2.22911E-09 |
| <i>Skint6</i>    | -2.900927483 | 2.24804E-23 |
| <i>Tchhl1</i>    | -2.907731533 | 1.50725E-10 |
| <i>Gm11568</i>   | -2.908526281 | 1.29009E-06 |
| <i>Krtap4-7</i>  | -2.91398894  | 1.78054E-07 |
| <i>Gm7137</i>    | -2.916935428 | 1.60793E-11 |
| <i>Cacna1i</i>   | -2.924081905 | 1.49045E-05 |
| <i>Mcpt1</i>     | -2.929058195 | 2.68907E-06 |
| <i>Gm11563</i>   | -2.950776363 | 7.54361E-08 |
| <i>Krtap1-4</i>  | -2.950894008 | 3.75498E-07 |
| <i>Slc26a3</i>   | -2.95610856  | 1.30539E-05 |
| <i>Slco5a1</i>   | -2.961304037 | 6.33496E-08 |
| <i>Tm4sf4</i>    | -2.973220132 | 3.39684E-07 |
| <i>Myom2</i>     | -2.976942234 | 4.24932E-14 |

|                      |              |             |
|----------------------|--------------|-------------|
| <i>Krt33a</i>        | -2.988912655 | 1.48924E-05 |
| <i>Prr5l</i>         | -3.00190194  | 1.40801E-12 |
| <i>Krtap9-3</i>      | -3.002199979 | 1.92628E-07 |
| <i>Gm11555</i>       | -3.038827069 | 1.0316E-08  |
| <i>Krtap4-1</i>      | -3.048323868 | 6.66748E-08 |
| <i>Krtap19-4</i>     | -3.070748245 | 4.21077E-07 |
| <i>Ifitm6</i>        | -3.076503284 | 1.85044E-05 |
| <i>Krtap4-13</i>     | -3.082121515 | 4.20477E-11 |
| <i>Gm10100</i>       | -3.112213951 | 3.62528E-07 |
| <i>Krtap6-3</i>      | -3.139561986 | 1.17596E-15 |
| <i>Cdh6</i>          | -3.158513135 | 6.65201E-10 |
| <i>Krtap4-6</i>      | -3.171133216 | 5.10367E-09 |
| <i>Gm11559</i>       | -3.1897993   | 7.31455E-07 |
| <i>Gm9789</i>        | -3.266386675 | 9.38716E-15 |
| <i>Gm11567</i>       | -3.294143605 | 9.75131E-08 |
| <i>Kcnn3</i>         | -3.29895543  | 0.000196629 |
| <i>Krtap9-1</i>      | -3.323377576 | 1.57182E-07 |
| <i>Krtap8-1</i>      | -3.416045085 | 1.8243E-10  |
| <i>Slc6a13</i>       | -3.417379874 | 1.14647E-09 |
| <i>Krtap19-3</i>     | -3.430161668 | 5.45638E-10 |
| <i>Krtap14</i>       | -3.440406152 | 9.09171E-08 |
| <i>Krtap15</i>       | -3.478945133 | 5.54133E-07 |
| <i>Krtap1-5</i>      | -3.491914134 | 8.71638E-10 |
| <i>Crispl</i>        | -3.510979271 | 0.00010015  |
| <i>Krtap19-9b</i>    | -3.523189558 | 3.4226E-09  |
| <i>Apba2</i>         | -3.535020946 | 7.33937E-14 |
| <i>0610040J01Rik</i> | -3.539111308 | 3.34626E-21 |
| <i>Krtap31-1</i>     | -3.539655678 | 7.10884E-14 |
| <i>Krtap19-9a</i>    | -3.580508701 | 8.35191E-12 |
| <i>Krtap7-1</i>      | -3.589561545 | 1.79772E-12 |
| <i>Gad1l</i>         | -3.615695474 | 6.58278E-18 |
| <i>Ccdc80</i>        | -3.639550869 | 4.37034E-26 |
| <i>Krtap19-2</i>     | -3.664810219 | 5.74446E-07 |
| <i>Gm6358</i>        | -3.666610846 | 3.54636E-15 |
| <i>1110057P08Rik</i> | -3.681039574 | 9.25208E-41 |
| <i>Gm11565</i>       | -3.681376756 | 1.63051E-21 |
| <i>Krtap16-3</i>     | -3.727720341 | 1.11493E-10 |
| <i>Gm10153</i>       | -3.757762644 | 2.20536E-17 |
| <i>Krtap5-5</i>      | -3.769537723 | 3.99624E-08 |
| <i>Krtap19-1</i>     | -3.844610307 | 4.38272E-09 |
| <i>Krtap5-3</i>      | -3.847258335 | 7.91006E-10 |
| <i>Krtap5-2</i>      | -3.856372316 | 3.23441E-10 |
| <i>Krtap28-13</i>    | -3.963397758 | 1.5323E-08  |
| <i>Gm4553</i>        | -3.970478793 | 1.07964E-29 |

|                  |              |             |
|------------------|--------------|-------------|
| <i>Stk33</i>     | -3.987568342 | 1.45121E-08 |
| <i>Gm4559</i>    | -3.992923633 | 3.4901E-21  |
| <i>Gm2431</i>    | -4.058621123 | 1.07964E-29 |
| <i>Krtap31-2</i> | -4.14950965  | 2.16359E-18 |
| <i>Krtap5-4</i>  | -4.160511689 | 6.96535E-12 |
| <i>Rasgrf2</i>   | -4.232670612 | 6.77847E-26 |
| <i>Ogn</i>       | -4.244275854 | 9.2366E-46  |
| <i>Krtap5-1</i>  | -4.296088346 | 9.67429E-31 |
| <i>Hhip</i>      | -4.364200841 | 1.88577E-31 |
| <i>Skint9</i>    | -6.745196022 | 7.72867E-52 |
| <i>Skint3</i>    | -7.298019329 | 4.29114E-75 |
| <i>Skint4</i>    | -7.504350272 | 1.72776E-81 |

**SUPPLEMENTARY TABLE S5: Downregulated DEGs (SKOvsCTR) are enriched for *Krt* and *Krtap* genes.**

| <b>Gene name</b>  | <b>SKOvsCTR : logFC</b> | <b>SKOvsCTR : FDR</b> |
|-------------------|-------------------------|-----------------------|
| <i>Krtap5-1</i>   | -4.296088346            | 9.67429E-31           |
| <i>Krtap5-4</i>   | -4.160511689            | 6.96535E-12           |
| <i>Krtap31-2</i>  | -4.14950965             | 2.16359E-18           |
| <i>Krtap28-13</i> | -3.963397758            | 1.5323E-08            |
| <i>Krtap5-2</i>   | -3.856372316            | 3.23441E-10           |
| <i>Krtap5-3</i>   | -3.847258335            | 7.91006E-10           |
| <i>Krtap19-1</i>  | -3.844610307            | 4.38272E-09           |
| <i>Krtap5-5</i>   | -3.769537723            | 3.99624E-08           |
| <i>Krtap16-3</i>  | -3.727720341            | 1.11493E-10           |
| <i>Krtap19-2</i>  | -3.664810219            | 5.74446E-07           |
| <i>Krtap7-1</i>   | -3.589561545            | 1.79772E-12           |
| <i>Krtap19-9a</i> | -3.580508701            | 8.35191E-12           |
| <i>Krtap31-1</i>  | -3.539655678            | 7.10884E-14           |
| <i>Krtap19-9b</i> | -3.523189558            | 3.4226E-09            |
| <i>Krtap1-5</i>   | -3.491914134            | 8.71638E-10           |
| <i>Krtap15</i>    | -3.478945133            | 5.54133E-07           |
| <i>Krtap14</i>    | -3.440406152            | 9.09171E-08           |
| <i>Krtap19-3</i>  | -3.430161668            | 5.45638E-10           |
| <i>Krtap8-1</i>   | -3.416045085            | 1.8243E-10            |
| <i>Krtap9-1</i>   | -3.323377576            | 1.57182E-07           |
| <i>Krtap4-6</i>   | -3.171133216            | 5.10367E-09           |
| <i>Krtap6-3</i>   | -3.139561986            | 1.17596E-15           |
| <i>Krtap4-13</i>  | -3.082121515            | 4.20477E-11           |
| <i>Krtap19-4</i>  | -3.070748245            | 4.21077E-07           |
| <i>Krtap4-1</i>   | -3.048323868            | 6.66748E-08           |
| <i>Krtap9-3</i>   | -3.002199979            | 1.92628E-07           |
| <i>Krt33a</i>     | -2.988912655            | 1.48924E-05           |
| <i>Krtap1-4</i>   | -2.950894008            | 3.75498E-07           |
| <i>Krtap4-7</i>   | -2.91398894             | 1.78054E-07           |
| <i>Krtap29-1</i>  | -2.895859207            | 2.22911E-09           |
| <i>Krtap1-3</i>   | -2.879373593            | 5.7069E-07            |
| <i>Krtap4-2</i>   | -2.876686498            | 3.17171E-08           |
| <i>Krt33b</i>     | -2.809277596            | 8.9707E-06            |
| <i>Krtap2-4</i>   | -2.788916728            | 5.77165E-08           |
| <i>Krt81</i>      | -2.774425057            | 4.12154E-06           |
| <i>Krtap12-1</i>  | -2.77128549             | 1.1035E-05            |
| <i>Krtap19-5</i>  | -2.75142545             | 1.51539E-08           |
| <i>Krtap4-9</i>   | -2.748577738            | 4.59821E-07           |
| <i>Krtap4-8</i>   | -2.747906331            | 1.5101E-07            |
| <i>Krtap11-1</i>  | -2.710909734            | 1.72766E-05           |
| <i>Krt86</i>      | -2.671458891            | 1.06086E-05           |
| <i>Krt83</i>      | -2.650453549            | 1.43813E-06           |

|                  |              |             |
|------------------|--------------|-------------|
| <i>Krt34</i>     | -2.599388566 | 9.78274E-06 |
| <i>Krtap4-16</i> | -2.581645002 | 2.25559E-05 |
| <i>Krt31</i>     | -2.575171731 | 6.37958E-05 |
| <i>Krtap10-4</i> | -2.502256535 | 0.000246438 |
| <i>Krtap26-1</i> | -2.492125566 | 3.34894E-06 |
| <i>Krt72</i>     | -2.489701735 | 0.000148852 |
| <i>Krtap22-2</i> | -2.489617149 | 2.1348E-10  |
| <i>Krt26</i>     | -2.454577579 | 0.000414244 |
| <i>Krt25</i>     | -2.439247604 | 0.000820776 |
| <i>Krtap6-5</i>  | -2.390259491 | 1.40149E-09 |
| <i>Krtap13-1</i> | -2.369384887 | 2.46055E-07 |
| <i>Krtap17-1</i> | -2.321898671 | 1.27436E-06 |
| <i>Krt40</i>     | -2.321606551 | 0.000600181 |
| <i>Krtap21-1</i> | -2.283547921 | 3.51027E-10 |
| <i>Krt74</i>     | -2.275954929 | 5.55206E-07 |
| <i>Krtap24-1</i> | -2.239869449 | 0.002094061 |
| <i>Krtap9-5</i>  | -2.239650443 | 3.16972E-06 |
| <i>Krtap16-1</i> | -2.238163589 | 0.001130784 |
| <i>Krtap6-1</i>  | -2.219588854 | 5.02769E-07 |
| <i>Krt82</i>     | -2.182144456 | 0.00363494  |
| <i>Krt39</i>     | -2.005277415 | 2.47386E-06 |
| <i>Krtap3-2</i>  | -1.943491018 | 3.80019E-10 |
| <i>Krt27</i>     | -1.932209761 | 0.001183934 |
| <i>Krtap20-2</i> | -1.914210347 | 6.96535E-12 |
| <i>Krtap6-2</i>  | -1.847137771 | 1.72425E-08 |
| <i>Krtap27-1</i> | -1.837078961 | 5.62097E-05 |
| <i>Krt71</i>     | -1.740036414 | 0.002466243 |
| <i>Krt28</i>     | -1.651752676 | 0.001385896 |
| <i>Krt73</i>     | -1.632066943 | 0.00250614  |
| <i>Krtap3-3</i>  | -1.588324369 | 0.000148329 |
| <i>Krt32</i>     | -1.521351633 | 0.002693656 |
| <i>Krtap3-1</i>  | -1.217224229 | 0.000503954 |



**SUPPLEMENTARY TABLE S6: Overlap of upregulated DEGs (SKOvsCTR) and the GO\_Immune\_System\_Process gene set.**

| <b>Gene name</b> | <b>SKOvsCTR : logFC</b> | <b>SKOvsCTR : FDR</b> |
|------------------|-------------------------|-----------------------|
| <i>Ccl2</i>      | 5.569476383             | 2.4143E-32            |
| <i>Ccl1</i>      | 4.96704325              | 2.31247E-33           |
| <i>S100a9</i>    | 4.622518139             | 1.43652E-10           |
| <i>Ccl20</i>     | 4.228922878             | 4.66147E-23           |
| <i>S100a8</i>    | 4.174235752             | 5.45686E-11           |
| <i>Pglyrp2</i>   | 4.100906903             | 5.13833E-45           |
| <i>Blk</i>       | 3.385207475             | 9.2625E-09            |
| <i>Cxcl10</i>    | 3.2093752               | 1.16146E-08           |
| <i>Tnfsf4</i>    | 3.157810331             | 8.93336E-05           |
| <i>Icos</i>      | 3.025441396             | 0.000115095           |
| <i>Cxcl9</i>     | 2.988683416             | 0.000689781           |
| <i>Il2rg</i>     | 2.924128947             | 5.27519E-08           |
| <i>Ltb</i>       | 2.917122347             | 7.03577E-06           |
| <i>Ccr2</i>      | 2.906344841             | 2.25655E-08           |
| <i>Epb42</i>     | 2.879079741             | 8.41099E-07           |
| <i>Gbp2</i>      | 2.861369161             | 1.03382E-06           |
| <i>Cxcl1</i>     | 2.837231096             | 7.51794E-07           |
| <i>Il18r1</i>    | 2.821486218             | 1.32664E-17           |
| <i>Ccl7</i>      | 2.818406405             | 0.000224406           |
| <i>Cd247</i>     | 2.7702066               | 6.69687E-06           |
| <i>Igsf6</i>     | 2.640476991             | 1.96569E-05           |
| <i>Cd3e</i>      | 2.608574217             | 1.26872E-05           |
| <i>Ctsk</i>      | 2.583007451             | 0.00012796            |
| <i>Il18rap</i>   | 2.43188571              | 6.72608E-06           |
| <i>Tnf</i>       | 2.364621827             | 2.13605E-06           |
| <i>Slc16a3</i>   | 2.331840536             | 3.83735E-22           |
| <i>Pmaip1</i>    | 2.270588654             | 7.92366E-09           |
| <i>Lax1</i>      | 2.231451207             | 2.10887E-20           |
| <i>Mmp9</i>      | 2.21669885              | 2.68206E-10           |
| <i>Lcn2</i>      | 2.114326884             | 3.1714E-10            |
| <i>Slpi</i>      | 2.062517659             | 5.56526E-12           |
| <i>Casp4</i>     | 2.037305091             | 0.000272302           |
| <i>Artn</i>      | 2.033294683             | 2.40136E-07           |
| <i>Mx1</i>       | 1.989569898             | 9.55259E-05           |
| <i>Chga</i>      | 1.940190275             | 3.60766E-09           |
| <i>Lif</i>       | 1.870071066             | 4.10946E-07           |
| <i>Il7r</i>      | 1.867356535             | 1.58689E-08           |
| <i>Dock2</i>     | 1.719123784             | 0.000113138           |
| <i>Nlrc5</i>     | 1.710007555             | 9.31974E-21           |
| <i>Fgr</i>       | 1.543307444             | 0.002954787           |
| <i>Krt1</i>      | 1.540248096             | 0.000161752           |
| <i>Rltpr</i>     | 1.536677471             | 0.001873894           |

|                 |             |             |
|-----------------|-------------|-------------|
| <i>Ets1</i>     | 1.524817188 | 2.04355E-13 |
| <i>Ccr1</i>     | 1.514548667 | 0.001077273 |
| <i>Psmb9</i>    | 1.507861764 | 5.86659E-07 |
| <i>Vcam1</i>    | 1.481892988 | 0.000570118 |
| <i>Itgb7</i>    | 1.477629277 | 0.000424397 |
| <i>Krt16</i>    | 1.473964756 | 4.92006E-11 |
| <i>Psmb8</i>    | 1.468655102 | 4.8278E-13  |
| <i>Fcgr2b</i>   | 1.459207252 | 0.000407716 |
| <i>Hsp90ab1</i> | 1.458004795 | 3.07521E-09 |
| <i>Il1f6</i>    | 1.447659593 | 3.27643E-10 |
| <i>Fst</i>      | 1.442738865 | 2.5538E-14  |
| <i>Notch4</i>   | 1.421053645 | 0.000154891 |
| <i>B2m</i>      | 1.379895788 | 9.01899E-16 |
| <i>Coro1a</i>   | 1.378541738 | 4.59076E-06 |
| <i>Klf2</i>     | 1.36067873  | 0.000463746 |
| <i>Gsdmd</i>    | 1.318862445 | 0.000324693 |
| <i>Tbkbp1</i>   | 1.286445136 | 6.95766E-05 |
| <i>Ctss</i>     | 1.281983114 | 2.32335E-05 |
| <i>C1rl</i>     | 1.253907743 | 1.23164E-05 |
| <i>Kcnab2</i>   | 1.232263077 | 0.001323203 |
| <i>Isg15</i>    | 1.229937075 | 0.004799382 |
| <i>Ly75</i>     | 1.184912412 | 2.30916E-05 |
| <i>Fas</i>      | 1.177586048 | 0.001065651 |
| <i>Cyba</i>     | 1.175404835 | 0.000487845 |
| <i>Tnfsf18</i>  | 1.173972425 | 0.002649254 |
| <i>Lat</i>      | 1.169941928 | 0.006626504 |
| <i>Itgax</i>    | 1.162489042 | 0.000340789 |
| <i>Irf1</i>     | 1.152309193 | 1.33336E-06 |
| <i>Anxa3</i>    | 1.14686161  | 3.09785E-06 |
| <i>Selplg</i>   | 1.139932891 | 3.85628E-05 |
| <i>Spn</i>      | 1.1251528   | 0.000638154 |
| <i>Lgals9</i>   | 1.12183177  | 6.86959E-09 |
| <i>Lcp1</i>     | 1.114584033 | 6.20328E-05 |
| <i>Tnfrsf25</i> | 1.114468972 | 0.000434425 |
| <i>Csf1</i>     | 1.113633752 | 0.000200065 |
| <i>Nckap1l</i>  | 1.09836085  | 0.000861462 |
| <i>Serp1b12</i> | 1.095479028 | 3.29726E-06 |
| <i>Cxcl16</i>   | 1.083921222 | 7.89148E-10 |
| <i>Tmem173</i>  | 1.0677548   | 0.004052918 |
| <i>Tap2</i>     | 1.061812691 | 5.34864E-10 |
| <i>H2-Eb1</i>   | 1.042248308 | 8.26218E-07 |
| <i>Pglyrp3</i>  | 1.040281782 | 0.000108119 |
| <i>Jak3</i>     | 1.039237981 | 0.000487845 |
| <i>Il1f5</i>    | 1.031253951 | 1.08214E-07 |

|                 |             |             |
|-----------------|-------------|-------------|
| <i>Icam1</i>    | 1.030354606 | 2.55228E-07 |
| <i>Serpinb9</i> | 1.027089861 | 0.008812934 |
| <i>Il33</i>     | 1.004278997 | 0.000204035 |
| <i>Ccl22</i>    | 1.001835942 | 4.66887E-06 |
